# Supplementary material for: Reexamination of N-terminal domains of syntaxin-1 in vesicle fusion from central murine synapses
Source: eLife. 2021 Aug 24;10:e69498. doi: 10.7554/eLife.69498 (PMC8416022; doi:10.7554/eLife.69498)
Supplement: Figure 1—figure supplement 1—source data 1. [file elife-69498-fig1-figsupp1-data1.xlsx]

## Sheet: Figure 1-supplement 1A
Figure	Parameter measured	Statistical test	Genotype	Number of independent cultures	Number of observations	Parametric distribution 'Kolmogorov - Smirnov test'	Mean	SEM	Median	Mean ranks	Adjusted p-value (vs WT)	Adjusted p-value (vs STX1-null)
Figure 1-supplement 1A	STX1A/Bassoon (%; norm. to WT)	Kruskal-Wallis Dunn's post-hoc	STX1-null	2	30	No	13.04	1.585	15.93	11.02	<0.0001
			WT	2	30	No	100	7.513	54.73	83.45		<0.0001
			WT-FLAG	2	30	Yes	131	10.16	65.83	125.5	0.2996	<0.0001

## Sheet: Figure 1-supplement 1B
Figure	Parameter measured	Statistical test	Genotype	Number of independent cultures	Number of observations	Parametric distribution 'Kolmogorov - Smirnov test'	Mean	SEM	Median	Mean ranks	Adjusted p-value (vs WT)	Adjusted p-value (vs STX1-null)
Figure 1-supplement 1B	FLAG/Bassoon (%; norm. to WT-FLAG)	Kruskal-Wallis Dunn's post-hoc	WT	2	30	Yes	10.64	0.5158	10.27	31.07	<0.0001
			WT-FLAG	2	30	Yes	100	9.608	88.65	123.1
			∆N2-9-FLAG	2	30	No	30.37	2.802	25.82	78.73	<0.0001
			LEOpen-FLAG	2	30	Yes	78.59	8.511	61.8	113	0.0002
			∆Habc-FLAG	2	30	Yes	10.7	0.4837	10.27	31.6	>0.9999
