# Supplementary material for: Reexamination of N-terminal domains of syntaxin-1 in vesicle fusion from central murine synapses
Source: eLife. 2021 Aug 24;10:e69498. doi: 10.7554/eLife.69498 (PMC8416022; doi:10.7554/eLife.69498)
Supplement: Figure 1—source data 1. [file elife-69498-fig1-data1.xlsx]

## Sheet: Fig 1C
Figure	Parameter measured	Statistical test	Genotype	Number of independent cultures	Number of observations	Parametric distribution 'Kolmogorov - Smirnov test'	Mean	SEM	Median	Mean ranks	Adjusted p-value (vs WT)	Adjusted p-value (vs STX1-null)
1C	STX1A/Bassoon (%; norm. to WT)	Kruskal-Wallis Dunn's post-hoc	STX1-null	4	52	No	11.56	1.145	8.47	69.92	<0.0001
			WT	4	60	No	100	5.857	86.31	225.4
			∆N2-9	4	61	No	86.9	4.905	76.51	212	>0.9999	<0.0001
			∆Habc	4	54	No	9.765	1.761	5.91	50	<0.0001	>0.9999
			LEOpen	4	58	No	37.43	4.128	27.37	137.3	<0.0001	0.0002

## Sheet: Fig 1D
Figure	Parameter measured	Statistical test	Genotype	Number of independent cultures	Number of observations	Parametric distribution 'Kolmogorov - Smirnov test'	Mean	SEM	Median	Mean ranks	Adjusted p-value (vs WT)	Adjusted p-value (vs STX1-null)
1D	Munc18-1/Bassoon (%; norm. to WT)	Kruskal-Wallis Dunn's post-hoc	STX1-null	4	37	Yes	30.98	2.457	26.5	67.51	<0.0001
			WT	4	45	Yes	100	6.735	94.25	172.7		<0.0001
			∆N2-9	4	45	No	63.28	3.962	59.32	137.9	0.0686	<0.0001
			∆Habc	4	39	No	26.98	4.046	20.58	47.15	<0.0001	>0.9999
			LEOpen	4	45	No	40.34	3.437	33.49	90.07	<0.0001	0.9601

## Sheet: Fig 1E
Figure	Parameter measured	Statistical test	Genotype	Number of independent cultures	Number of observations	Parametric distribution 'Kolmogorov - Smirnov test'	Mean	SEM	Median	Mean ranks	Adjusted p-value (vs WT)	Adjusted p-value (vs STX1-null)
1E	EPSC Amplitude (nA)	Kruskal-Wallis Dunn's post-hoc	STX1-null	4	20	No	0.1654	0.05904	0	154.1	<0.0001
			WT	4	48	No	2.326	0.2697	1.915	65.1		<0.0001
			∆N2-9	4	46	No	1.577	0.244	1.163	84.17	>0.9999	<0.0001
			∆Habc	4	50	No	0.4344	0.1874	0.0009005	147.3	<0.0001	>0.9999
			LEOpen	3	32	No	3.229	0.4727	2.75	58.25	>0.9999	<0.0001

## Sheet: Fig 1F
Figure	Parameter measured	Statistical test	Genotype	Number of independent cultures	Number of observations	Parametric distribution 'Kolmogorov - Smirnov test'	Mean	SEM	Median	Mean ranks	Adjusted p-value (vs WT)	Adjusted p-value (vs STX1-null)
1F	RRP Total Charge (nC)	Kruskal-Wallis Dunn's post-hoc	STX1-null	4	19	No	0.01987	0.005936	0.004991	141.7	<0.0001
			WT	4	42	No	0.2875	0.03884	0.2036	57.46		<0.0001
			∆N2-9	4	44	Yes	0.2081	0.02526	0.1692	69.44	>0.9999	<0.0001
			∆Habc	4	46	No	0.05845	0.01773	0.003854	131.5	<0.0001	>0.9999
			LEOpen	3	31	No	0.1978	0.04254	0.117	78.82	0.8672	0.0004

## Sheet: Fig 1G
Figure	Parameter measured	Statistical test	Genotype	Number of independent cultures	Number of observations	Parametric distribution 'Kolmogorov - Smirnov test'	Mean	SEM	Median	Mean ranks	Adjusted p-value (vs WT)	Adjusted p-value (vs STX1-null)
1G	Pvr (%)	Kruskal-Wallis Dunn's post-hoc	WT	4	38	No	5.323	0.7046	4.062	64.72
			∆N2-9	4	40	Yes	4.876	0.5378	4.161	65.14	>0.9999
			∆Habc	4	19	No	3.037	0.8851	2.105	39.53	0.0888
			LEOpen	3	30	No	14.33	3.262	6.127	77.07	>0.9999

## Sheet: Fig 1H
Figure	Parameter measured	Statistical test	Genotype	Number of independent cultures	Number of observations	Parametric distribution 'Kolmogorov - Smirnov test'	Mean	SEM	Median	Mean ranks	Adjusted p-value (vs WT)	Adjusted p-value (vs STX1-null)
1H	mEPSC frequency (Hz)	Kruskal-Wallis Dunn's post-hoc	STX1-null	4	18	No	0.3078	0.124	0.095	45.5	<0.0001
			WT	4	41	No	4.444	0.8956	2.667	109.3		<0.0001
			∆N2-9	4	42	No	2.2	0.3958	1.45	90.87	0.9092	0.0119
			∆Habc	4	42	No	0.853	0.3521	0.075	52.43	<0.0001	>0.9999
			LEOpen	3	30	No	6.393	1.195	3.907	124.4	>0.9999	<0.0001

## Sheet: Fig 1I
Figure	Parameter measured	Stimulus number (x-axis)	Statistical test	Number of independent cultures	Number of observations	Mean	SEM	Number of observations	Mean	SEM	Adjusted p-value (vs WT)	Number of observations	Mean	SEM	Adjusted p-value (vs WT)	Number of observations	Mean	SEM	Adjusted p-value (vs WT)
					WT			∆N2-9				∆Habc				LEOpen
1I	EPSC(X)/EPSC(1)	1	Mixed effect analysis	6	41	1	0	42	1	0		14	1	0		26	1	0
		2	Followed by Tukey's post-hoc			0.979225	0.0659522		0.979426	0.0538681	>0.9999		1.09043	0.180803	0.9373		0.783777	0.0783641	0.2364
		3				0.88421	0.0630095		0.995684	0.081253	0.7002		1.1046	0.147218	0.5292		0.703832	0.0969408	0.4112
		4				0.845468	0.0792974		0.879175	0.0701944	0.9888		1.24756	0.26182	0.4779		0.639824	0.0945482	0.3509
		5				0.78751	0.0788356		0.868458	0.0712212	0.8713		1.04668	0.167634	0.515		0.577943	0.0878055	0.2952
		6				0.763163	0.0718137		0.864008	0.0779292	0.7771		1.20862	0.229887	0.2885		0.507581	0.0817094	0.0989
		7				0.734517	0.07237		0.857122	0.0839462	0.6868		1.25866	0.28348	0.3157		0.535663	0.0894788	0.3195
		8				0.747688	0.0746543		0.858006	0.089693	0.7805		1.13744	0.246174	0.4527		0.507959	0.0832129	0.1514
		9				0.693661	0.0660968		0.870123	0.0989465	0.453		1.19497	0.278601	0.3348		0.472798	0.076425	0.1396
		10				0.676929	0.0553583		0.874136	0.0802215	0.189		1.31719	0.286423	0.1726		0.479647	0.0878512	0.2428
		11				0.682247	0.0541365		0.942263	0.112965	0.1731		1.16315	0.258227	0.3035		0.469701	0.0732833	0.1041
		12				0.685647	0.0608935		0.903093	0.0884091	0.1882		1.18739	0.22808	0.1901		0.463171	0.0725224	0.0993
		13				0.704705	0.0608277		0.870392	0.0854843	0.3967		1.26818	0.305727	0.3103		0.473835	0.0887928	0.1539
		14				0.723701	0.0713876		0.910729	0.098994	0.4236		1.21961	0.280737	0.3525		0.408442	0.0619589	0.0076
		15				0.682185	0.0563993		0.916898	0.0929908	0.1456		1.14082	0.270708	0.3798		0.474238	0.0891093	0.2139
		16				0.693554	0.0658073		0.884933	0.088697	0.3142		1.28139	0.330838	0.3396		0.422101	0.0669257	0.0265
		17				0.66073	0.0530904		0.957738	0.114261	0.0971		1.17344	0.278472	0.3101		0.406547	0.0700146	0.0277
		18				0.688774	0.0570059		0.873902	0.0811424	0.2513		1.0818	0.275133	0.5201		0.389655	0.0632014	0.0047
		19				0.692841	0.0597527		1.01109	0.132607	0.1389		1.08473	0.25739	0.4719		0.426193	0.0710591	0.0286
		20				0.694234	0.0583738		0.956328	0.109877	0.1623		1.38097	0.349539	0.2579		0.423419	0.0666537	0.0174
		21				0.682017	0.0506503		0.93663	0.0991981	0.1126		1.15248	0.281734	0.3879		0.429926	0.0719336	0.0302
		22				0.705248	0.0588587		0.927416	0.0986378	0.2238		1.28708	0.372183	0.44		0.41064	0.0626451	0.006
		23				0.690458	0.0528735		0.922498	0.104198	0.2046		1.22618	0.310258	0.3594		0.436548	0.0710848	0.0298
		24				0.684652	0.0575665		0.906105	0.0884497	0.1637		1.12375	0.30917	0.5218		0.404573	0.0617451	0.0082
		25				0.684206	0.0559662		0.983415	0.110311	0.0842		1.20611	0.323122	0.4147		0.424451	0.0737366	0.0345
		26				0.697483	0.0621901		0.992368	0.0984101	0.0636		1.16585	0.27768	0.3857		0.416537	0.0644198	0.0137
		27				0.692987	0.0625174		0.927574	0.0880691	0.1407		1.08525	0.303456	0.5976		0.450776	0.0797407	0.0914
		28				0.677694	0.0509529		0.976717	0.100451	0.0484		1.28622	0.319415	0.2803		0.38148	0.057295	0.0016
		29				0.685351	0.0552047		1.03238	0.112065	0.0358		1.2469	0.327375	0.3646		0.419991	0.0670856	0.0178
		30				0.672006	0.0520356		0.985531	0.119148	0.0865		1.12265	0.289488	0.446		0.440162	0.0680123	0.044
		31				0.679713	0.0558275		0.94297	0.0860092	0.0585		1.09015	0.288524	0.5215		0.423768	0.0706177	0.0312
		32				0.679789	0.0593274		0.977268	0.109174	0.0886		1.15627	0.289788	0.404		0.424149	0.0637977	0.0239
		33				0.660779	0.0490789		0.975777	0.103181	0.0379		1.30427	0.362121	0.3327		0.398389	0.0675308	0.0145
		34				0.669603	0.0503845		1.03268	0.109725	0.0199		1.19404	0.323315	0.4092		0.437752	0.0735697	0.0579
		35				0.706737	0.0598724		1.00083	0.103916	0.0774		1.16043	0.320005	0.5233		0.404076	0.060276	0.0039
		36				0.66532	0.0536401		0.969187	0.106916	0.0638		1.19451	0.323206	0.4026		0.405786	0.0675343	0.0202
		37				0.688143	0.0589872		0.969957	0.0918512	0.0566		1.33721	0.392771	0.3932		0.396702	0.0623431	0.0065
		38				0.679863	0.0563292		1.02073	0.106868	0.0317		1.09441	0.300163	0.5443		0.405952	0.0599194	0.0079
		39				0.672134	0.0498262		0.932568	0.0950098	0.0824		1.3153	0.330463	0.2635		0.431073	0.0696273	0.0342
		40				0.672152	0.052045		1.01394	0.110009	0.0333		1.28729	0.352694	0.3488		0.417928	0.0651698	0.0182
		41				0.665816	0.0491321		0.931576	0.0961904	0.0766		1.06301	0.281837	0.5265		0.414386	0.066499	0.019
		42				0.697276	0.0574269		1.02991	0.109117	0.0434		1.39496	0.373021	0.294		0.406852	0.0579008	0.0039
		43				0.658077	0.0545961		0.966361	0.101165	0.045		1.28881	0.339196	0.2992		0.377973	0.0516413	0.0023
		44				0.657992	0.049873		1.03496	0.116631	0.0221		1.28742	0.340419	0.3022		0.43824	0.0722695	0.0723
		45				0.684191	0.0554394		0.980536	0.106676	0.0757		1.15988	0.333426	0.5157		0.441854	0.0688776	0.0402
		46				0.685549	0.0553718		0.995618	0.113839	0.0789		1.43928	0.352825	0.1985		0.433354	0.0735178	0.0407
		47				0.665125	0.0536718		1.07358	0.128246	0.0242		1.33202	0.334357	0.2463		0.383772	0.063249	0.0068
		48				0.670416	0.0567347		1.03609	0.119969	0.038		1.14944	0.303217	0.4348		0.373514	0.0553328	0.0022
		49				0.701637	0.0622607		1.02685	0.10725	0.0517		1.19193	0.311705	0.4401		0.419269	0.070698	0.0204
		50				0.681333	0.0523117		1.01139	0.104959	0.0325		1.28359	0.334158	0.3233		0.41242	0.0715463	0.0194
