# Supplementary material for: Reexamination of N-terminal domains of syntaxin-1 in vesicle fusion from central murine synapses
Source: eLife. 2021 Aug 24;10:e69498. doi: 10.7554/eLife.69498 (PMC8416022; doi:10.7554/eLife.69498)
Supplement: Figure 2—source data 1. [file elife-69498-fig2-data1.xlsx]

## Sheet: Fig 2B
Figure	Parameter measured	Statistical test	Genotype	Number of independent cultures	Number of observations	Parametric distribution 'Kolmogorov - Smirnov test'	Mean	SEM	Median	Mean ranks	Adjusted p-value (vs WT)	Adjusted p-value (vs STX1-null)
2B	Neuronal density (DIV 8; #/mm2)	Kruskal-Wallis Dunn's post-hoc	STX1-null	4	120	No	39.73	2.072	35.37	192.9	0.7869
			WT	4	120	No	40.14	2.667	31.71	177.9		0.7869
			∆Habc	4	120	No	35.6	1.977	30.89	170.7	>0.9999	0.295

## Sheet: Fig 2C
Figure	Parameter measured	Statistical test	Genotype	Number of independent cultures	Number of observations	Parametric distribution 'Kolmogorov - Smirnov test'	Mean	SEM	Median	Mean ranks	Adjusted p-value (vs WT)	Adjusted p-value (vs STX1-null)
2C	Cell Number (DIV 15 / DIV 8; %)	Kruskal-Wallis Dunn's post-hoc	STX1-null	4	120	No	110.5	9.328	91.1	265.9	<0.0001
			WT	4	120	No	26.18	2.156	20.95	112.7		<0.0001
			∆Habc	4	120	No	45.65	3.483	34.4	162.9	<0.0001	0.0006
	Cell Number (DIV 22 / DIV 8; %)	Kruskal-Wallis Dunn's post-hoc	STX1-null	3	90	No	103.5	6.308	87.85	219.9	<0.0001
			WT	3	90	No	11.96	1.886	5.618	82.1		<0.0001
			∆Habc	3	90	No	17.88	1.951	12.4	104.5	<0.0001	0.1616
	Cell Number (DIV 29 / DIV 8; %)	Kruskal-Wallis Dunn's post-hoc	STX1-null	3	90	No	95.71	6.093	83.9	287.7	<0.0001
			WT	3	90	No	2.754	0.6948	0	114		<0.0001
			∆Habc	3	90	No	2.976	0.5332	0	127.6	<0.0001	0.8675

## Sheet: Fig 2E
Figure	Parameter measured	Statistical test	Genotype	Number of independent cultures	Number of observations	Parametric distribution 'Kolmogorov - Smirnov test'	Mean	SEM	Median	Mean ranks	Adjusted p-value (vs WT)	Adjusted p-value (vs STX1-null)
2E	AZ length (nm)	Kruskal-Wallis Dunn's post-hoc	STX1-null	2	97	No	392.8	19.74	344.8	151.7	0.6565
			WT	2	97	No	348.5	14.71	339.1	137.5		0.6565
			∆Habc	2	83	No	341.4	16.92	292.9	125.9	>0.9999	0.0953

## Sheet: Fig 2F
Figure	Parameter measured	Statistical test	Genotype	Number of independent cultures	Number of observations	Parametric distribution 'Kolmogorov - Smirnov test'	Mean	SEM	Median	Mean ranks	Adjusted p-value (vs WT)	Adjusted p-value (vs STX1-null)
2F	# of SV (200 nm from AZ)	Kruskal-Wallis Dunn's post-hoc	STX1-null	2	97	No	22.92	1.078	22	130.4	0.005
			WT	2	97	Yes	28.44	1.376	27	166.6		0.005
			∆Habc	2	83	No	21.05	1.095	19	116.9	<0.0001	0.7776

## Sheet: Fig 2G
Figure	Parameter measured	Statistical test	Genotype	Number of independent cultures	Number of observations	Parametric distribution 'Kolmogorov - Smirnov test'	Mean	SEM	Median	Mean ranks	Adjusted p-value (vs WT)	Adjusted p-value (vs STX1-null)
2G	Docked SV (per synaptic section)	Kruskal-Wallis Dunn's post-hoc	STX1-null	2	97	No	0.4536	0.0803	0	124.8	<0.0001
			WT	2	100	No	1.1	0.1193	1	169.3		<0.0001
			∆Habc	2	83	No	0.4699	0.09596	0	124.1	<0.0001	>0.9999

## Sheet: Fig 2H
Figure	Parameter measured	Distance from AZ (nm) (x-axis)	Statistical test	Number of independent cultures	Number of observations	Mean	SEM	Number of observations	Mean	SEM	Adjusted p-value
					WT			STX1-null
2H	SV distribution	0	Multiple t-tests	2	97	1.1134	0.122506	97	0.453608	0.0802977	<0.0001
		5				0.608247	0.0861509		0.463918	0.0867783	0.2393
		10				0.835052	0.10637		0.701031	0.0869057	0.3304
		15				0.412371	0.0617482		0.57732	0.0800492	0.1044
		20				0.412371	0.0729128		0.463918	0.0762381	0.6257
		25				0.412371	0.066762		0.371134	0.0676679	0.6649
		30				0.329897	0.0562305		0.298969	0.051115	0.6845
		35				0.525773	0.0704258		0.350515	0.0639501	0.067
		40				0.587629	0.0838719		0.226804	0.0518248	0.0003
		45				0.659794	0.0902062		0.505155	0.0689323	0.1748
		50				0.618557	0.0884713		0.556701	0.0802288	0.6051
		55				0.57732	0.0773196		0.515464	0.0704572	0.555
		60				0.639175	0.0778049		0.443299	0.0654896	0.0556
		65				0.536082	0.0748163		0.505155	0.0719806	0.7661
		70				0.824742	0.0816106		0.484536	0.0748902	0.0024
		75				0.731959	0.0768744		0.453608	0.0733065	0.0095
		80				0.793814	0.104596		0.525773	0.0704258	0.0348
		85				0.845361	0.0930813		0.680412	0.0885963	0.2008
		90				0.783505	0.100714		0.608247	0.076932	0.1683
		95				0.742268	0.0832624		0.804124	0.0887087	0.6117
		100				0.886598	0.0925446		0.783505	0.0894173	0.4241

## Sheet: Fig 2I
Figure	Parameter measured	Distance from AZ (nm) (x-axis)	Statistical test	Number of independent cultures	Number of observations	Mean	SEM	Number of observations	Mean	SEM	Adjusted p-value
					WT			∆Habc
2I	SV distribution	0	Multiple t-tests	3	148	0.972973	0.090425	137	0.364964	0.0654245	<0.0001
		5				0.554054	0.0679891		0.350365	0.0609352	0.0273
		10				0.709459	0.0768552		0.49635	0.0639713	0.0355
		15				0.398649	0.0495798		0.452555	0.0603863	0.4882
		20				0.324324	0.0518248		0.328467	0.0464607	0.9528
		25				0.371622	0.050988		0.328467	0.0498059	0.5463
		30				0.324324	0.0471822		0.357664	0.0535727	0.6397
		35				0.47973	0.0579017		0.255474	0.0463679	0.003
		40				0.506757	0.0617635		0.445255	0.0594447	0.475
		45				0.547297	0.0652646		0.372263	0.0486036	0.0345
		50				0.614865	0.0739725		0.408759	0.0563247	0.0293
		55				0.560811	0.0623042		0.532847	0.0613389	0.7498
		60				0.560811	0.0600502		0.452555	0.0567198	0.1927
		65				0.5	0.0594916		0.576642	0.0601653	0.3663
		70				0.77027	0.0678611		0.474453	0.0586819	0.0012
		75				0.736486	0.0638599		0.532847	0.06391	0.0252
		80				0.716216	0.0779167		0.642336	0.0636459	0.4674
		85				0.804054	0.0715307		0.59854	0.0659018	0.0363
		90				0.72973	0.0758567		0.708029	0.0855366	0.8491
		95				0.75	0.0683877		0.547445	0.0576583	0.0254
		100				0.804054	0.0728045		0.59854	0.0706194	0.0442
