# Supplementary material for: Reexamination of N-terminal domains of syntaxin-1 in vesicle fusion from central murine synapses
Source: eLife. 2021 Aug 24;10:e69498. doi: 10.7554/eLife.69498 (PMC8416022; doi:10.7554/eLife.69498)
Supplement: Figure 3—figure supplement 1—source data 1. [file elife-69498-fig3-figsupp1-data1.xlsx]

## Sheet: Fig 3 - Supp 1B
Figure	Parameter measured	Statistical test	Genotype	Number of independent cultures	Number of observations	Parametric distribution 'Kolmogorov - Smirnov test'	Mean	SEM	Median	Mean ranks	Adjusted p-value (vs WT)	Adjusted p-value (vs STX1-null)
Figure 3-supplement 1B	STX1A/Bassoon (%; norm. to WT)	Kruskal-Wallis Dunn's post-hoc	STX1-null	3	39	No	5.076	1.044	4.538	20.1	<0.0001
			WT	3	50	No	100	6.716	85.24	120.8		<0.0001
			S14A	3	50	No	87.15	4.132	79.08	112.4	<0.0001	<0.0001
			S14E	3	48	Yes	83.79	4.638	79.93	107	<0.0001	<0.0001

## Sheet: Fig 3 - Supp 1C
Figure	Parameter measured	Statistical test	Genotype	Number of independent cultures	Number of observations	Parametric distribution 'Kolmogorov - Smirnov test'	Mean	SEM	Median	Mean ranks	Adjusted p-value (vs WT)	Adjusted p-value (vs STX1-null)
Figure 3-supplement 1C	Munc18-1/ Bassoon (%; norm. to WT)	Kruskal-Wallis Dunn's post-hoc	STX1-null	3	39	No	28.05	1.881	26.1	23.31	<0.0001
			WT	3	50	Yes	100	6.78	90.43	115.9		<0.0001
			S14A	3	50	Yes	92.27	5.562	86.86	110.5	<0.0001	<0.0001
			S14E	3	48	No	99.45	7.851	87.16	111.4	<0.0001	<0.0001

## Sheet: Fig 3 - Supp 1D
Figure	Parameter measured	Statistical test	Genotype	Number of independent cultures	Number of observations	Parametric distribution 'Kolmogorov - Smirnov test'	Mean	SEM	Median	Mean ranks	Adjusted p-value (vs WT)	Adjusted p-value (vs STX1-null)
Figure 3-supplement 1D	EPSC Amplitude (nA)	Kruskal-Wallis Dunn's post-hoc	STX1-null	5	36	No	0.03339	0.0184	0	20.22	<0.0001
			WT	6	65	No	3.912	0.4256	3.015	122.3		<0.0001
			S14A	6	57	No	4.54	0.5278	3.07	129.4	>0.9999	<0.0001
			S14E	6	62	No	4.548	0.4245	3.97	133.1	>0.9999	<0.0001

## Sheet: Fig 3 - Supp 1E
Figure	Parameter measured	Statistical test	Genotype	Number of independent cultures	Number of observations	Parametric distribution 'Kolmogorov - Smirnov test'	Mean	SEM	Median	Mean ranks	Adjusted p-value (vs WT)	Adjusted p-value (vs STX1-null)
Figure 3-supplement 1E	RRP Total Charge (nC)	Kruskal-Wallis Dunn's post-hoc	STX1-null	3	20	No	0.008978	0.004177	0.0003699	12.28	<0.0001
			WT	6	58	No	0.3782	0.03536	0.3161	103.6		<0.0001
			S14A	6	55	No	0.4377	0.0496	0.3358	110.1	>0.9999	<0.0001
			S14E	6	58	No	0.4025	0.04305	0.3317	103.9	>0.9999	<0.0001

## Sheet: Fig 3 - Supp 1F
Figure	Parameter measured	Statistical test	Genotype	Number of independent cultures	Number of observations	Parametric distribution 'Kolmogorov - Smirnov test'	Mean	SEM	Median	Mean ranks	Adjusted p-value (vs WT)	Adjusted p-value (vs STX1-null)
Figure 3-supplement 1F	Pvr (%)	Kruskal-Wallis Dunn's post-hoc	WT	6	57	Yes	5.557	0.5457	4.844	77.77
			S14A	6	55	No	6.017	0.5641	5.096	83.62	>0.9999
			S14E	6	57	No	7.026	0.6595	6.405	93.56	0.2548

## Sheet: Fig 3 - Supp 1G
Figure	Parameter measured	Statistical test	Genotype	Number of independent cultures	Number of observations	Parametric distribution 'Kolmogorov - Smirnov test'	Mean	SEM	Median	Mean ranks	Adjusted p-value (vs WT)
Figure 3-supplement 1G	EPSC2/EPSC1	Kruskal-Wallis Dunn's post-hoc	WT	4	37	No	1.201	0.07304	1.094	47.27
			S14A	4	34	Yes	1.28	0.05807	1.305	60.29	0.2237
			S14E	4	35	No	1.211	0.05292	1.162	53.49	>0.9999

## Sheet: Fig 3 - Supp 1H
Figure	Parameter measured	Statistical test	Genotype	Number of independent cultures	Number of observations	Parametric distribution 'Kolmogorov - Smirnov test'	Mean	SEM	Median	Mean ranks	Adjusted p-value (vs WT)	Adjusted p-value (vs STX1-null)
Figure 3-supplement 1H	mEPSC frequency (Hz)	Kruskal-Wallis Dunn's post-hoc	STX1-null	3	12	No	0.14	0.1226	0	18.67	0.0001
			WT	6	55	No	5.206	0.7788	2.83	87.53		0.0001
			S14A	6	50	No	5.877	0.929	3.633	90.99	>0.9999	<0.0001
			S14E	6	60	No	6.833	0.8124	5.75	102.8	0.6648	<0.0001

## Sheet: Fig 3 - Supp 1I
Figure	Parameter measured	Stimulus number (x-axis)	Statistical test	Number of independent cultures	Number of observations	Mean	SEM	Number of observations	Mean	SEM	Adjusted p-value (vs WT)	Number of observations	Mean	SEM	Adjusted p-value (vs WT)
					WT			S14A				S14E
Figure 3-supplement 3I	EPSC(X)/EPSC(1)	1	Mixed effect analysis	4	34	1	0	35	1	0		30	1	0
		2	Followed by Tukey's post-hoc			0.958261	0.0350569		0.910596	0.0295877	0.5552		0.980701	0.0432172	0.9144
		3				0.87462	0.0462995		0.824442	0.0412692	0.6988		0.865105	0.0384409	0.9863
		4				0.833368	0.0592541		0.74283	0.0361	0.3986		0.802988	0.0494599	0.9183
		5				0.82045	0.0700708		0.740555	0.0460571	0.6094		0.766805	0.0423353	0.7902
		6				0.740182	0.0579094		0.712299	0.0439947	0.9223		0.731027	0.0446175	0.9914
		7				0.748846	0.0676143		0.706629	0.0476266	0.8666		0.689306	0.0344414	0.7142
		8				0.730966	0.0772147		0.667265	0.0425509	0.7513		0.698144	0.0470508	0.93
		9				0.714521	0.070734		0.669621	0.0429431	0.8507		0.699153	0.044831	0.9816
		10				0.696013	0.0622258		0.675491	0.0394222	0.9581		0.70361	0.0435389	0.9945
		11				0.724907	0.0761364		0.67866	0.0445809	0.8599		0.688623	0.0400005	0.9067
		12				0.731546	0.0810142		0.69862	0.0477927	0.9348		0.653895	0.033246	0.6515
		13				0.716383	0.0682996		0.689165	0.0467087	0.9422		0.6968	0.0392677	0.9665
		14				0.717549	0.0695617		0.681607	0.0471122	0.9042		0.692176	0.0430132	0.9484
		15				0.686652	0.0605003		0.694868	0.049206	0.9939		0.671835	0.0341377	0.9752
		16				0.743581	0.0861773		0.700984	0.0487688	0.9032		0.67879	0.0402573	0.7756
		17				0.718409	0.0682954		0.694073	0.05037	0.9557		0.662366	0.0415811	0.764
		18				0.711387	0.0660449		0.683311	0.0472736	0.9363		0.677623	0.0347399	0.8936
		19				0.702329	0.0721345		0.702881	0.0536549	>0.9999		0.685746	0.0456956	0.9794
		20				0.70275	0.0673492		0.716885	0.0574805	0.9861		0.685375	0.040032	0.9733
		21				0.728567	0.0796493		0.709317	0.0529635	0.9779		0.703532	0.0415774	0.9581
		22				0.713618	0.0837877		0.705587	0.0566817	0.9965		0.699989	0.0437676	0.9886
		23				0.730011	0.0952606		0.680624	0.0480153	0.8889		0.70785	0.0434692	0.9756
		24				0.731361	0.0991819		0.715136	0.0560607	0.9889		0.683267	0.0402068	0.8949
		25				0.701123	0.0811076		0.708474	0.05499	0.9969		0.697791	0.0389806	0.9992
		26				0.717934	0.0886044		0.682305	0.0517351	0.9358		0.675926	0.0333085	0.8974
		27				0.700529	0.0809228		0.71665	0.0568962	0.9855		0.697085	0.0395257	0.9992
		28				0.716379	0.077108		0.716943	0.0528182	>0.9999		0.686861	0.0382723	0.9373
		29				0.692581	0.0792554		0.713667	0.0558437	0.9743		0.676109	0.0326878	0.9799
		30				0.700506	0.083029		0.697487	0.0507566	0.9995		0.669054	0.0343297	0.9348
		31				0.726561	0.0852713		0.689928	0.0517255	0.9284		0.677667	0.0397287	0.8621
		32				0.699621	0.0941498		0.704002	0.0528985	0.9991		0.707066	0.0429431	0.9972
		33				0.684332	0.0783686		0.696442	0.047782	0.9905		0.697056	0.0402531	0.9886
		34				0.724894	0.0985687		0.692799	0.049459	0.9544		0.711456	0.0506233	0.9919
		35				0.728399	0.10786		0.678861	0.0489822	0.9083		0.680791	0.0356785	0.908
		36				0.709062	0.0829158		0.677683	0.0490737	0.9433		0.670559	0.038028	0.9067
		37				0.715394	0.0939909		0.66623	0.0450798	0.8849		0.687097	0.0409112	0.9589
		38				0.707056	0.0922939		0.676208	0.0493712	0.9533		0.660893	0.0366419	0.888
		39				0.703336	0.0891603		0.664132	0.0451343	0.9188		0.666784	0.0348136	0.9229
		40				0.696753	0.0856392		0.670362	0.0478422	0.9609		0.681608	0.039802	0.9859
		41				0.712443	0.0980943		0.660896	0.0474546	0.8843		0.664482	0.0348694	0.8899
		42				0.755129	0.119086		0.648943	0.0418176	0.6798		0.65645	0.0387644	0.7125
		43				0.704468	0.0910123		0.67021	0.0478835	0.9407		0.653075	0.039125	0.8626
		44				0.721275	0.101845		0.666957	0.044334	0.8769		0.672198	0.041082	0.896
		45				0.69707	0.0828449		0.659593	0.0460892	0.9176		0.666197	0.04739	0.944
		46				0.729655	0.107744		0.667445	0.0487617	0.859		0.658948	0.0440725	0.8169
		47				0.696738	0.0926464		0.663305	0.0457081	0.944		0.644795	0.0356864	0.8605
		48				0.646699	0.0652549		0.651181	0.0470105	0.9983		0.661264	0.044235	0.9814
		49				0.690533	0.0825917		0.643919	0.0468682	0.876		0.637395	0.0379745	0.829
		50				0.691069	0.0819776		0.655441	0.044106	0.9226		0.638509	0.0371646	0.8294
[truncated: 14 more columns]
