# Supplementary material for: Reexamination of N-terminal domains of syntaxin-1 in vesicle fusion from central murine synapses
Source: eLife. 2021 Aug 24;10:e69498. doi: 10.7554/eLife.69498 (PMC8416022; doi:10.7554/eLife.69498)
Supplement: Figure 3—figure supplement 2—source data 1. [file elife-69498-fig3-figsupp2-data1.xlsx]

## Sheet: Figure 3-supplement 2C
Figure	Parameter measured	Statistical test	Genotype	Number of independent cultures	Number of observations	Parametric distribution 'Kolmogorov - Smirnov test'	Mean	SEM	Median	Mean ranks	Adjusted p-value (vs WT)	Adjusted p-value (vs STX1-null)
Figure 3-supplement 2C	Neuronal density (DIV 8; #/mm2)	Kruskal-Wallis Dunn's post-hoc	STX1-null	4	120	No	31.13	1.844	26.02	330.2	0.0608
			WT	4	120	No	41.78	2.683	32.93	420.1		0.0608
			∆N2-9	4	90	No	38.94	3.4	28.46	381.6	>0.9999	>0.9999
			∆N2-19	4	120	No	43.67	2.454	37.4	452.3	>0.9999	0.0011
			∆N2-28	4	120	No	41.81	2.141	36.18	457	>0.9999	0.0006
			S14A	4	120	No	42.41	2.611	33.33	436.3	>0.9999	0.0093
			S14E	4	120	No	36.57	2.739	26.83	355.1	0.6575	>0.9999

## Sheet: Figure 3-supplement 2D
Figure	Parameter measured	Statistical test	Genotype	Number of independent cultures	Number of observations	Parametric distribution 'Kolmogorov - Smirnov test'	Mean	SEM	Median	Mean ranks	Adjusted p-value (vs WT)	Adjusted p-value (vs STX1-null)
Figure 3-supplement 2D	Cell Number (DIV 29 / DIV 8; %)	Kruskal-Wallis Dunn's post-hoc	STX1-null	4	120	No	1.27	0.2438	0	70.81	<0.0001
			WT	4	120	No	93.16	6.006	80.55	445.5		<0.0001
			∆N2-9	4	90	No	104	8.697	80.62	459.3	>0.9999	<0.0001
			∆N2-19	4	120	No	101.9	6.099	80.9	479.8	>0.9999	<0.0001
			∆N2-28	4	120	No	94.18	5.658	84.73	461.3	>0.9999	<0.0001
			S14A	4	120	No	109	8.381	86.18	471.6	>0.9999	<0.0001
			S14E	4	105	No	95.4	8.866	62.02	415.3	>0.9999	<0.0001
