# Supplementary material for: Reexamination of N-terminal domains of syntaxin-1 in vesicle fusion from central murine synapses
Source: eLife. 2021 Aug 24;10:e69498. doi: 10.7554/eLife.69498 (PMC8416022; doi:10.7554/eLife.69498)
Supplement: Figure 3—source data 1. [file elife-69498-fig3-data1.xlsx]

## Sheet: Fig 3B
Figure	Parameter measured	Statistical test	Genotype	Number of independent cultures	Number of observations	Parametric distribution 'Kolmogorov - Smirnov test'	Mean	SEM	Median	Mean ranks	Adjusted p-value (vs WT)	Adjusted p-value (vs STX1-null)
3B	STX1A/Bassoon (%; norm. to WT)	Kruskal-Wallis Dunn's post-hoc	STX1-null	5	77	No	6.189	0.8806	2.507	40.75	<0.0001
			WT	5	80	No	100	4.433	93.93	295.7		<0.0001
			∆N2-9	5	80	No	85.61	4.967	71.44	257.1	0.3366	<0.0001
			∆N2-19	5	80	No	62.08	4.298	51.47	200.1	<0.0001	<0.0001
			∆N2-28	5	80	No	57.91	2.918	54.7	195.5	<0.0001	<0.0001

## Sheet: Fig 3C
Figure	Parameter measured	Statistical test	Genotype	Number of independent cultures	Number of observations	Parametric distribution 'Kolmogorov - Smirnov test'	Mean	SEM	Median	Mean ranks	Adjusted p-value (vs WT)	Adjusted p-value (vs STX1-null)
3C	Munc18-1/Bassoon (%; norm. to WT)	Kruskal-Wallis Dunn's post-hoc	STX1-null	5	77	No	28.15	1.528	24.47	49.01	<0.0001
			WT	5	80	No	100	4.717	94.35	256.8		<0.0001
			∆N2-9	5	80	No	80.32	3.609	72.39	211.1	0.1173	<0.0001
			∆N2-19	5	80	No	100.6	5.091	93.49	255.2	>0.9999	<0.0001
			∆N2-28	5	80	No	81.41	3.443	77.81	217.3	0.2947	<0.0001

## Sheet: Fig 3D
Figure	Parameter measured	Statistical test	Genotype	Number of independent cultures	Number of observations	Parametric distribution 'Kolmogorov - Smirnov test'	Mean	SEM	Median	Mean ranks	Adjusted p-value (vs WT)	Adjusted p-value (vs STX1-null)
3D	EPSC Amplitude (nA)	Kruskal-Wallis Dunn's post-hoc	STX1-null	6	26	No	0.02284	0.01753	0	16	<0.0001
			WT	6	54	Yes	5.745	0.6222	4.742	140.3		<0.0001
			∆N2-9	6	48	Yes	5.365	0.5219	4.52	142.8	>0.9999	<0.0001
			∆N2-19	6	55	No	4.102	0.3942	3.336	122.2	>0.9999	<0.0001
			∆N2-28	6	49	No	3.724	0.4712	2.58	111.5	0.2979	<0.0001

## Sheet: Fig 3E
Figure	Parameter measured	Statistical test	Genotype	Number of independent cultures	Number of observations	Parametric distribution 'Kolmogorov - Smirnov test'	Mean	SEM	Median	Mean ranks	Adjusted p-value (vs WT)	Adjusted p-value (vs STX1-null)
3E	RRP Total Charge (nC)	Kruskal-Wallis Dunn's post-hoc	STX1-null	6	25	No	0.001926	0.001328	0	14.36	<0.0001
			WT	6	52	No	0.4743	0.05717	0.3741	126.1		<0.0001
			∆N2-9	6	47	No	0.5131	0.04733	0.4483	142	>0.9999	<0.0001
			∆N2-19	6	50	No	0.3914	0.03483	0.3534	123.1	>0.9999	<0.0001
			∆N2-28	6	49	No	0.3448	0.04292	0.2565	106.8	>0.9999	<0.0001

## Sheet: Fig 3F
Figure	Parameter measured	Statistical test	Genotype	Number of independent cultures	Number of observations	Parametric distribution 'Kolmogorov - Smirnov test'	Mean	SEM	Median	Mean ranks	Adjusted p-value (vs WT)	Adjusted p-value (vs STX1-null)
3F	Pvr (%)	Kruskal-Wallis Dunn's post-hoc	WT	6	52	No	7.973	0.6654	7.039	111.4
			∆N2-9	6	47	Yes	7.021	0.6487	6.097	99.12	>0.9999
			∆N2-19	6	49	No	6.43	0.6159	6.179	91.94	0.5011
			∆N2-28	6	47	No	6.312	0.611	5.023	88.39	0.2577

## Sheet: Fig 3G
Figure	Parameter measured	Statistical test	Genotype	Number of independent cultures	Number of observations	Parametric distribution 'Kolmogorov - Smirnov test'	Mean	SEM	Median	Mean ranks	Adjusted p-value (vs WT)	Adjusted p-value (vs STX1-null)
3G	EPSC2/EPSC1	Kruskal-Wallis Dunn's post-hoc	WT	6	53	No	1.269	0.06917	1.128	86.87
			∆N2-9	6	48	Yes	1.206	0.0345	1.183	89.97	>0.9999
			∆N2-19	6	53	Yes	1.377	0.05612	1.323	112.9	0.1272
			∆N2-28	6	47	Yes	1.361	0.0556	1.301	114.8	0.0998

## Sheet: Fig 3H
Figure	Parameter measured	Statistical test	Genotype	Number of independent cultures	Number of observations	Parametric distribution 'Kolmogorov - Smirnov test'	Mean	SEM	Median	Mean ranks	Adjusted p-value (vs WT)	Adjusted p-value (vs STX1-null)
3H	mEPSC frequency (Hz)	two-way ANOVA (of the means of the responses)	STX1-null	6	25	No	0.1344	0.07004	0	27.08	<0.0001
			WT	6	49	No	6.313	0.9259	4.27	135.7		<0.0001
			∆N2-9	6	46	No	4.407	0.5858	3.21	126.3	>0.9999	<0.0001
			∆N2-19	6	52	No	3.707	0.5628	2.47	112.7	0.6884	<0.0001
			∆N2-28	6	48	No	3.529	0.544	2.595	110.6	0.5123	<0.0001

## Sheet: Fig 3I
Figure	Parameter measured	Statistical test	Genotype	Number of independent cultures	Number of observations	Parametric distribution 'Kolmogorov - Smirnov test'	Mean	SEM	Median	Mean ranks	Adjusted p-value (vs WT)	Adjusted p-value (vs STX1-null)
3I	mEPSC rate (Hz)	Kruskal-Wallis Dunn's post-hoc	WT	6	39	No	0.001783	0.000245	0.001301	97
			∆N2-9	6	41	No	0.00114	0.0001616	0.0007388	72.63	0.1168
			∆N2-19	6	42	No	0.00169	0.000344	0.0008387	76.74	0.3039
			∆N2-28	6	39	No	0.001541	0.0003986	0.0009315	78.38	0.4672
