# Supplementary material for: Reexamination of N-terminal domains of syntaxin-1 in vesicle fusion from central murine synapses
Source: eLife. 2021 Aug 24;10:e69498. doi: 10.7554/eLife.69498 (PMC8416022; doi:10.7554/eLife.69498)
Supplement: Figure 4—figure supplement 1—source data 1. [file elife-69498-fig4-figsupp1-data1.xlsx]

## Sheet: Figure 4-supplement 1B
Figure	Parameter measured	Statistical test	Genotype	Number of independent cultures	Number of observations	Parametric distribution 'Kolmogorov - Smirnov test'	Mean	SEM	Median	Mean ranks	Adjusted p-value (vs WT)	Adjusted p-value (vs STX1-null)
Figure 4-supplement 1B	Neuronal density (DIV 8; #/mm2)	Kruskal-Wallis Dunn's post-hoc	STX1-null	3	90	No	36.83	2.573	31.3	263.8	>0.9999
			WT	3	90	No	34.56	2.338	30.89	253.6		>0.9999
			LEOpen	3	90	No	36.81	2.564	34.55	280.6	>0.9999	>0.9999
			LEOpen + ∆N2-9	3	90	No	31.53	1.37	32.52	257.9	>0.9999	>0.9999
			LEOpen + ∆N2-19	3	90	Yes	35.65	2.066	32.93	276.1	>0.9999	>0.9999
			LEOpen + ∆N2-28	3	90	No	38.15	2.304	34.15	291	>0.9999	>0.9999

## Sheet: Figure 4-supplement 1C
Figure	Parameter measured	Statistical test	Genotype	Number of independent cultures	Number of observations	Parametric distribution 'Kolmogorov - Smirnov test'	Mean	SEM	Median	Mean ranks	Adjusted p-value (vs WT)	Adjusted p-value (vs STX1-null)
Figure 4-supplement 1C	Cell Number (DIV 15 / DIV 8; %)	Kruskal-Wallis Dunn's post-hoc	STX1-null	3	90	No	30.08	2.889	24.69	93.7	<0.0001
			WT	3	90	No	130.3	13.38	97.4	315.6		<0.0001
			LEOpen	3	90	No	121.9	8.953	116.5	337.4	>0.9999	<0.0001
			LEOpen + ∆N2-9	3	90	Yes	97.13	5.824	89.19	289.8	>0.9999	<0.0001
			LEOpen + ∆N2-19	3	90	No	95.21	5.077	89.63	290.8	>0.9999	<0.0001
			LEOpen + ∆N2-28	3	90	No	106.7	7.263	90.4	295.7	>0.9999	<0.0001
	Cell Number (DIV 22 / DIV 8; %)	Kruskal-Wallis Dunn's post-hoc	STX1-null	3	90	No	9.313	1.904	1.466	73.2	<0.0001
			WT	3	90	No	105.7	7.225	87.55	357.6		<0.0001
			LEOpen	3	90	No	105.7	9.324	93.23	352.6	>0.9999	<0.0001
			LEOpen + ∆N2-9	3	90	No	69.95	4.457	63.73	282	0.0172	<0.0001
			LEOpen + ∆N2-19	3	90	Yes	64.03	4.77	56.25	262.1	0.0006	<0.0001
			LEOpen + ∆N2-28	3	90	No	78.33	5.802	67.8	295.5	0.113	<0.0001
	Cell Number (DIV 29 / DIV 8; %)	Kruskal-Wallis Dunn's post-hoc	STX1-null	3	84	No	3.56	0.923	0	73.51	<0.0001
			WT	3	90	No	97.2	6.789	87.44	400.8		<0.0001
			LEOpen	3	90	No	83.22	7.474	70.09	365.6	>0.9999	<0.0001
			LEOpen + ∆N2-9	3	90	No	39.38	3.16	34.58	261.1	<0.0001	<0.0001
			LEOpen + ∆N2-19	3	90	No	35.42	3.702	27.68	235.6	<0.0001	<0.0001
			LEOpen + ∆N2-28	3	90	No	39.8	3.834	30.95	255.4	<0.0001	<0.0001
	Cell Number (DIV 36 / DIV 8; %)	Kruskal-Wallis Dunn's post-hoc	STX1-null	3	90	No	0	0	0	70	<0.0001
			WT	3	90	No	98.3	6.567	78.5	439.6		<0.0001
			LEOpen	3	90	No	77.26	7.16	56.24	387.1	0.341	<0.0001
			LEOpen + ∆N2-9	3	90	No	26.43	3.519	15.06	259.4	<0.0001	<0.0001
			LEOpen + ∆N2-19	3	90	No	18.17	2.706	9.985	221.3	<0.0001	<0.0001
			LEOpen + ∆N2-28	3	90	No	22.31	2.849	9.135	245.6	<0.0001	<0.0001
	Cell Number (DIV 43 / DIV 8; %)	Kruskal-Wallis Dunn's post-hoc	STX1-null	3	84	No	0	0	0	93	<0.0001
			WT	3	90	No	82.18	6.911	68.9	448.5		<0.0001
			LEOpen	3	90	No	51.24	4.846	44.4	390.9	0.1724	<0.0001
			LEOpen + ∆N2-9	3	90	No	11.38	1.746	5.137	244.6	<0.0001	<0.0001
			LEOpen + ∆N2-19	3	90	No	5.745	0.8124	2.768	205.6	<0.0001	<0.0001
			LEOpen + ∆N2-28	3	90	No	10.17	1.432	5.481	240.3	<0.0001	<0.0001
