# Supplementary material for: Reexamination of N-terminal domains of syntaxin-1 in vesicle fusion from central murine synapses
Source: eLife. 2021 Aug 24;10:e69498. doi: 10.7554/eLife.69498 (PMC8416022; doi:10.7554/eLife.69498)
Supplement: Figure 4—figure supplement 2—source data 1. [file elife-69498-fig4-figsupp2-data1.xlsx]

## Sheet: Figure 4-supplement 2C
Figure	Parameter measured	Statistical test	Genotype	Number of independent cultures	Number of observations	Parametric distribution 'Kolmogorov - Smirnov test'	Mean	SEM	Median	Mean ranks	Adjusted p-value (vs WT 1X)	Adjusted p-value (vs LEOpen 1X)
Figure 4-supplement 2C	NLS-GFP fluoresence (norm. to WT 1X rescue (%))	Kruskal-Wallis Dunn's post-hoc	LEOpen + ∆N2-28 1X	2	20	Yes	116.4	9.644	118.5	92.35	>0.9999	>0.9999
			WT 1X	2	20	No	100	7.445	97.69	83.7		>0.9999
			WT 1/12 X	2	20	Yes	23.97	4.026	16.65	23.7	<0.0001	<0.0001
			LEOpen 1 X	2	20	Yes	97.91	9.237	104.6	81.8	>0.9999
			LEOpen 1/3 X	2	20	Yes	45.6	8.796	31.43	42.7	0.0029	<0.0001
			LEOpen 1/6 X	2	20	No	35.62	3.981	32.78	38.75	0.0007	<0.0001

## Sheet: Figure 4-supplement 2D
Figure	Parameter measured	Statistical test	Genotype	Number of independent cultures	Number of observations	Parametric distribution 'Kolmogorov - Smirnov test'	Mean	SEM	Median	Mean ranks	Adjusted p-value (vs WT 1X)	Adjusted p-value (vs LEOpen 1X)
Figure 4-supplement 2D	STX1A / VGlut1 (norm. to WT 1X rescue (%))	Kruskal-Wallis Dunn's post-hoc	LEOpen + ∆N2-28 1X	3	25	No	14.25	2.628	8.663	58.04	<0.0001	0.0222
			WT 1X	3	25	Yes	100	11.13	80.21	131.6		0.0661
			WT 1/12 X	3	24	No	17.12	3.568	9.526	64.54	<0.0001	0.1323
			LEOpen 1X	3	25	No	36.66	6.861	27.72	96.84	0.0661
			LEOpen 1/3 X	3	25	No	13.43	3.42	7.68	56.24	<0.0001	0.0132
			LEOpen 1/6 X	3	25	Yes	7.221	0.9206	5.979	42.32	<0.0001	0.0001

## Sheet: Figure 4-supplement 2E
Figure	Parameter measured	Statistical test	Genotype	Number of independent cultures	Number of observations	Parametric distribution 'Kolmogorov - Smirnov test'	Mean	SEM	Median	Mean ranks	Adjusted p-value (vs WT 1X)	Adjusted p-value (vs LEOpen 1X)
Figure 4-supplement 2E	Munc18-1 / VGlut1 (norm. to WT 1X rescue (%))	Kruskal-Wallis Dunn's post-hoc	LEOpen + ∆N2-28 1X	3	25	Yes	38.05	3.428	33.79	58.84	<0.0001	0.5617
			WT 1X	3	25	Yes	100	8.53	95.67	125.3
			WT 1/12 X	3	24	No	51.87	4.944	46.31	85.79	0.0203	>0.9999
			LEOpen 1X	3	25	Yes	49.68	4.217	44.73	84.24	0.0115
			LEOpen 1/3 X	3	25	Yes	31.78	2.563	27.93	44.04	<0.0001	0.0149
			LEOpen 1/6 X	3	25	Yes	33.4	2.07	32.33	52.2	<0.0001	0.13

## Sheet: Figure 4-supplement 2F
Figure	Parameter measured	Statistical test	Genotype	Number of independent cultures	Number of observations	Parametric distribution 'Kolmogorov - Smirnov test'	Mean	SEM	Median	Mean ranks	Adjusted p-value (vs WT 1X)	Adjusted p-value (vs LEOpen 1X)
Figure 4-supplement 2F	EPSC Amplitude (nA)	Kruskal-Wallis Dunn's post-hoc	LEOpen + ∆N2-28 1X	2	26	Yes	1.881	0.3298	1.372	46.31	0.069	0.0051
			WT 1X	2	25	Yes	4.764	0.8706	3.904	86.6		>0.9999
			WT 1/12 X	2	28	Yes	4.381	0.6894	3.164	84.64	>0.9999	>0.9999
			LEOpen 1X	2	28	No	4.967	0.6699	4.294	95.21	>0.9999
			LEOpen 1/3 X	2	28	Yes	5.508	0.8519	4.135	96.36	>0.9999	>0.9999
			LEOpen 1/6 X	2	26	Yes	4.44	0.6028	4.662	90.31	>0.9999	>0.9999

## Sheet: Figure 4-supplement 2G
Figure	Parameter measured	Statistical test	Genotype	Number of independent cultures	Number of observations	Parametric distribution 'Kolmogorov - Smirnov test'	Mean	SEM	Median	Mean ranks	Adjusted p-value (vs WT 1 X)	Adjusted p-value (vs LEOpen 1 X)
Figure 4-supplement 2G	RRP Total Charge (nC)	Kruskal-Wallis Dunn's post-hoc	LEOpen + ∆N2-28 1X	2	22	No	0.09649	0.01716	0.06153	45.05	0.001	>0.9999
			WT 1X	2	24	No	0.3806	0.08381	0.2417	94.21		0.1214
			WT 1/12 X	2	24	Yes	0.2948	0.05095	0.2201	89.63	>0.9999	0.3539
			LEOpen 1X	2	25	No	0.1554	0.02974	0.1088	62.64	0.1214
			LEOpen 1/3 X	2	26	No	0.1698	0.0236	0.1365	73.46	>0.9999	>0.9999
			LEOpen 1/6 X	2	23	Yes	0.1434	0.01809	0.1281	67.87	0.4571	>0.9999

## Sheet: Figure 4-supplement 2H
Figure	Parameter measured	Statistical test	Genotype	Number of independent cultures	Number of observations	Parametric distribution 'Kolmogorov - Smirnov test'	Mean	SEM	Median	Mean ranks	Adjusted p-value (vs WT 1 X)	Adjusted p-value (vs LEOpen 1 X)
Figure 4-supplement 2H	Pvr (%)	Kruskal-Wallis Dunn's post-hoc	LEOpen + ∆N2-28 1 X	2	22	No	9.831	1.545	7.598	57.14	>0.9999	0.0352
			WT 1 X	2	23	Yes	9.612	1.109	8.94	58.52		0.0459
			WT 1/12 X	2	24	No	11.11	1.902	8.016	59.92	>0.9999	0.0605
			LEOpen 1 X	2	25	Yes	19.94	2.775	16.2	93.72	0.0459
			LEOpen 1/3 X	2	25	No	15.32	2.978	10.47	70.28	>0.9999	0.6592
			LEOpen 1/6 X	2	23	Yes	15.09	1.417	14.66	87.48	0.2547	>0.9999

## Sheet: Figure 4-supplement 2I
Figure	Parameter measured	Statistical test	Genotype	Number of independent cultures	Number of observations	Parametric distribution 'Kolmogorov - Smirnov test'	Mean	SEM	Median	Mean ranks	Adjusted p-value (vs WT 1 X)	Adjusted p-value (vs LEOpen 1 X)
Figure 4-supplement 2I	mEPSC frequency (Hz)	Kruskal-Wallis Dunn's post-hoc	LEOpen + ∆N2-28 1 X	2	24	No	4.267	1.361	1.501	46.67	>0.9999	<0.0001
			WT 1 X	2	23	Yes	6.152	1.13	4.125	64.37		0.0038
			WT 1/12 X	2	24	No	4.04	1.051	2.54	49.96	>0.9999	<0.0001
			LEOpen 1 X	2	28	Yes	15.82	1.557	17	109.4	0.0038
			LEOpen 1/3 X	2	27	Yes	11.44	1.429	11.29	91.2	0.4574	>0.9999
			LEOpen 1/6 X	2	25	Yes	10.87	1.785	10.79	86.02	>0.9999	0.7768
