# Supplementary material for: Reexamination of N-terminal domains of syntaxin-1 in vesicle fusion from central murine synapses
Source: eLife. 2021 Aug 24;10:e69498. doi: 10.7554/eLife.69498 (PMC8416022; doi:10.7554/eLife.69498)
Supplement: Figure 4—figure supplement 3—source data 1. [file elife-69498-fig4-figsupp3-data1.xlsx]

## Sheet: Figure 4-supplement 3B
Figure	Parameter measured	Statistical test	Genotype	Number of independent cultures	Number of observations	Parametric distribution 'Kolmogorov - Smirnov test'	Mean	SEM	Median	Mean ranks	Adjusted p-value
Figure 4-supplement 3B	STX1A / VGlut1 (norm. to WT (%))	Mann-Whitney	STX1A+/+; STX1B+/+	4	39	No	100	8.517	96.34	30.46	0.0002
			STX1-null + STX1A WT	4	40	No	284.4	43	185.8	49.3

## Sheet: Figure 4-supplement 3Bw
Figure	Parameter measured	Statistical test	Genotype	Number of independent cultures	Number of observations	Parametric distribution 'Kolmogorov - Smirnov test'	Mean	SEM	Median	Adjusted p-value
Figure 4-supplement 3C	Munc18-1 / VGlut1 (norm. to WT (%))	Unpaired t-test	STX1A+/+; STX1B+/+	4	39	Yes	100	8.713	89.07	0.7573
			STX1-null + STX1A WT	4	40	Yes	103.9	8.949	96.68
