# Supplementary material for: Reexamination of N-terminal domains of syntaxin-1 in vesicle fusion from central murine synapses
Source: eLife. 2021 Aug 24;10:e69498. doi: 10.7554/eLife.69498 (PMC8416022; doi:10.7554/eLife.69498)
Supplement: Figure 4—source data 1. [file elife-69498-fig4-data1.xlsx]

## Sheet: Fig 4B
Figure	Parameter measured	Statistical test	Genotype	Number of independent cultures	Number of observations	Parametric distribution 'Kolmogorov - Smirnov test'	Mean	SEM	Median	Mean ranks	Adjusted p-value (vs WT)	Adjusted p-value (vs STX1-null)	Adjusted p-value (vs LEOpen)
4B	STX1A/Bassoon (%; norm. to WT)	Kruskal-Wallis Dunn's post-hoc	STX1-null	5	52	No	10.89	1.182	7.911	105.6	<0.0001		<0.0001
			WT	5	60		100	5.879	84.09	302.2		<0.0001	0.0013
			LEOpen	5	60	No	38.85	3.883	29.98	232.4	0.0013	<0.0001
			LEOpen + ∆N2-9	5	60	No	15.86	1.345	12.75	150.1	<0.0001	0.2375	<0.0001
			LEOpen + ∆N2-19	5	45	No	6.752	0.6468	5.231	63.44	<0.0001	0.5038	<0.0001
			LEOpen + ∆N2-28	5	60	No	12.94	1.371	10.03	125.4	<0.0001	>0.9999	<0.0001

## Sheet: Fig 4C
Figure	Parameter measured	Statistical test	Genotype	Number of independent cultures	Number of observations	Parametric distribution 'Kolmogorov - Smirnov test'	Mean	SEM	Median	Mean ranks	Adjusted p-value (vs WT)	Adjusted p-value (vs STX1-null)	Adjusted p-value (vs LEOpen)
4C	Munc18-1/Bassoon (%; norm. to WT)	Kruskal-Wallis Dunn's post-hoc	STX1-null	5	52	No	29.75	1.846	26.37	121.9	<0.0001		0.0196
			WT	5	60	Yes	100	5.49	93.04	296.9		<0.0001	<0.0001
			LEOpen	5	60	No	42.01	2.964	36.81	181.3	<0.0001	0.0196
			LEOpen + ∆N2-9	5	60	Yes	32.65	1.925	30.05	140.7	<0.0001	>0.9999	0.3386
			LEOpen + ∆N2-19	5	45	Yes	27.29	1.026	27.12	111.3	<0.0001	>0.9999	0.0041
			LEOpen + ∆N2-28	5	60	Yes	31.65	1.37	30.72	141.3	<0.0001	>0.9999	0.3697

## Sheet: Fig 4D
Figure	Parameter measured	Statistical test	Genotype	Number of independent cultures	Number of observations	Parametric distribution 'Kolmogorov - Smirnov test'	Mean	SEM	Median	Mean ranks	Adjusted p-value (vs WT)	Adjusted p-value (vs STX1-null)	Adjusted p-value (vs LEOpen)
4D	EPSC Amplitude (nA)	Kruskal-Wallis Dunn's post-hoc	WT	5	50	No	4.087	0.4997	3.175	127.7			0.1472
			LEOpen	5	40	Yes	7.069	0.8903	6.341	163	0.1472
			LEOpen + ∆N2-9	5	53	No	3.036	0.3795	2.029	105.8	>0.9999		0.0006
			LEOpen + ∆N2-19	5	48	No	3.129	0.4227	2.885	108.1	>0.9999		0.0017
			LEOpen + ∆N2-28	5	45	No	2.634	0.4354	1.459	94.71	0.1869		<0.0001

## Sheet: Fig 4E
Figure	Parameter measured	Statistical test	Genotype	Number of independent cultures	Number of observations	Parametric distribution 'Kolmogorov - Smirnov test'	Mean	SEM	Median	Mean ranks	Adjusted p-value (vs WT)	Adjusted p-value (vs STX1-null)	Adjusted p-value (vs LEOpen)
4E	RRP Total Charge (nC)	Kruskal-Wallis Dunn's post-hoc	WT	5	50	No	0.4277	0.04691	0.3432	154.4			0.3399
			LEOpen	5	41	No	0.3179	0.04802	0.1992	123.9	0.3399
			LEOpen + ∆N2-9	5	53	No	0.2322	0.03227	0.1534	102.1	0.001		>0.9999
			LEOpen + ∆N2-19	5	47	No	0.2737	0.03978	0.2088	113.6	0.0327		>0.9999
			LEOpen + ∆N2-28	5	45	No	0.1992	0.02559	0.1677	98.13	0.0006		0.8042

## Sheet: Fig 4F
Figure	Parameter measured	Statistical test	Genotype	Number of independent cultures	Number of observations	Parametric distribution 'Kolmogorov - Smirnov test'	Mean	SEM	Median	Mean ranks	Adjusted p-value (vs WT)	Adjusted p-value (vs STX1-null)	Adjusted p-value (vs LEOpen)
4F	Pvr (%)	Kruskal-Wallis Dunn's post-hoc	WT	5	50	No	5.038	0.523	3.819	91.17			<0.0001
			LEOpen	5	38	Yes	15.65	1.462	15.24	173.4	<0.0001
			LEOpen + ∆N2-9	5	52	No	6.9	0.8118	4.504	108	>0.9999		<0.0001
			LEOpen + ∆N2-19	5	45	No	7.191	0.9264	5.682	111.2	>0.9999		0.0002
			LEOpen + ∆N2-28	5	45	No	7.186	1.037	4.558	106.6	>0.9999		<0.0001

## Sheet: Fig 4G
Figure	Parameter measured	Statistical test	Genotype	Number of independent cultures	Number of observations	Parametric distribution 'Kolmogorov - Smirnov test'	Mean	SEM	Median	Mean ranks	Adjusted p-value (vs WT)	Adjusted p-value (vs STX1-null)	Adjusted p-value (vs LEOpen)
4G	EPSC2/EPSC1	Kruskal-Wallis Dunn's post-hoc	WT	5	48	No	1.524	0.1173	1.303	136.6			<0.0001
			LEOpen	5	39	No	0.7944	0.03842	0.763	46.36	<0.0001
			LEOpen + ∆N2-9	5	46	No	1.316	0.1008	1.095	113.2	0.7128		<0.0001
			LEOpen + ∆N2-19	5	43	No	1.428	0.1279	1.182	123.4	>0.9999		<0.0001
			LEOpen + ∆N2-28	5	41	No	1.328	0.09473	1.107	116.5	>0.9999		<0.0001

## Sheet: Fig 4H
Figure	Parameter measured	Statistical test	Genotype	Number of independent cultures	Number of observations	Parametric distribution 'Kolmogorov - Smirnov test'	Mean	SEM	Median	Mean ranks	Adjusted p-value (vs WT)	Adjusted p-value (vs STX1-null)	Adjusted p-value (vs LEOpen)
4H	mEPSC frequency (Hz)	Kruskal-Wallis Dunn's post-hoc	WT	4	41	No	3.646	0.6087	1.88	72.88			<0.0001
			LEOpen	4	34	Yes	14.7	1.443	15.78	144.3	<0.0001
			LEOpen + ∆N2-9	4	41	No	7.112	1.087	4.77	95.83	0.6108		0.0017
			LEOpen + ∆N2-19	4	38	No	6.136	0.9616	5.07	92.28	>0.9999		0.0007
			LEOpen + ∆N2-28	4	38	No	6.119	1.25	3.015	84.21	>0.9999		<0.0001

## Sheet: Fig 4I
Figure	Parameter measured	Statistical test	Genotype	Number of independent cultures	Number of observations	Parametric distribution 'Kolmogorov - Smirnov test'	Mean	SEM	Median	Mean ranks	Adjusted p-value (vs WT)	Adjusted p-value (vs STX1-null)	Adjusted p-value (vs LEOpen)
4I	mEPSC rate (Hz)	Kruskal-Wallis Dunn's post-hoc	WT	4	36	No	0.001008	0.0001643	0.00077	32.72			<0.0001
			LEOpen	4	31	No	0.01098	0.001212	0.009542	122.3	<0.0001
			LEOpen + ∆N2-9	4	26	No	0.004904	0.001016	0.002911	81.58	0.0001		0.0046
			LEOpen + ∆N2-19	4	31	No	0.004061	0.001039	0.001888	72.03	0.0024		<0.0001
			LEOpen + ∆N2-28	4	27	No	0.005011	0.001071	0.002367	79.74	0.0002		0.0022
