# Supplementary material for: Reexamination of N-terminal domains of syntaxin-1 in vesicle fusion from central murine synapses
Source: eLife. 2021 Aug 24;10:e69498. doi: 10.7554/eLife.69498 (PMC8416022; doi:10.7554/eLife.69498)
Supplement: Figure 5—figure supplement 1—source data 1. [file elife-69498-fig5-figsupp1-data1.xlsx]

## Sheet: Figure 5-supplement 1A
Figure	Parameter measured	Statistical test	Genotype	Number of independent cultures	Number of observations	Parametric distribution 'Kolmogorov - Smirnov test'	Mean	SEM	Median	Adjusted p-value (vs WT)
Figure 5-supplement 1A	# of VGlut1 puncta	One-way ANOVA; Tukey's post-hoc	WT	3	25	Yes	231.6	22.49	219	0.0002
			LEOpen	3	25	Yes	279.7	30.79	258	0.4834
			LEOpen + ∆N2-28	3	25	Yes	307.7	33.8	277	0.1675

## Sheet: Figure 5-supplement 1B
Figure	Parameter measured	Statistical test	Genotype	Number of independent cultures	Number of observations	Parametric distribution 'Kolmogorov - Smirnov test'	Mean	SEM	Median	Mean ranks	Adjusted p-value (vs WT)
Figure 5-supplement 1B	total area of VGlut1 puncta (μm2)	Kruskal-Wallis Dunn's post-hoc	WT	3	25	No	418.8	49.91	361.9	31.4
			LEOpen	3	25	No	591.2	85.54	489.6	38.88	0.6749
			LEOpen + ∆N2-28	3	25	No	820.3	133.8	545.9	43.72	0.137
