# Supplementary material for: Reexamination of N-terminal domains of syntaxin-1 in vesicle fusion from central murine synapses
Source: eLife. 2021 Aug 24;10:e69498. doi: 10.7554/eLife.69498 (PMC8416022; doi:10.7554/eLife.69498)
Supplement: Figure 5—source data 1. [file elife-69498-fig5-data1.xlsx]

## Sheet: Fig 5B
Figure	Parameter measured	Statistical test	Genotype	Number of independent cultures	Number of observations	Parametric distribution 'Kolmogorov - Smirnov test'	Mean	SEM	Median	Mean ranks	Adjusted p-value (vs WT)
5B	AZ length (nm)	Kruskal-Wallis Dunn's post-hoc	WT	3	148	No	311.2	10.93	288.2	259.3
			∆N2-28	2	142	No	316.6	10.26	290.3	268	>0.9999
			LEOpen	3	141	No	354.4	13.74	307.3	302.2	0.1216
			LEOpen + ΔN2-28	2	112	No	309	12.48	289.4	255.9	>0.9999

## Sheet: Fig 5C
Figure	Parameter measured	Statistical test	Genotype	Number of independent cultures	Number of observations	Parametric distribution 'Kolmogorov - Smirnov test'	Mean	SEM	Median	Mean ranks	Adjusted p-value (vs WT)
5C	# of SV (200 nm from AZ)	Kruskal-Wallis Dunn's post-hoc	WT	3	148	No	28.6	1.089	27	281.8
			∆N2-28	2	142	No	27.53	1.119	25.5	266	>0.9999
			LEOpen	3	141	No	30.7	1.176	28	305	>0.9999
			LEOpen + ΔN2-28	2	112	No	23.91	0.9671	22	225.1	0.0233

## Sheet: Fig 5D
Figure	Parameter measured	Statistical test	Genotype	Number of independent cultures	Number of observations	Parametric distribution 'Kolmogorov - Smirnov test'	Mean	SEM	Median	Mean ranks	Adjusted p-value (vs WT)
5D	# of docked SV (per synaptic section)	Kruskal-Wallis Dunn's post-hoc	WT	3	148	No	0.9527	0.09011	1	290.8
			∆N2-28	2	142	No	0.8732	0.09421	0	274.5	>0.9999
			LEOpen	3	141	No	0.9929	0.1068	1	290.3	>0.9999
			LEOpen + ΔN2-28	2	112	No	0.4464	0.06928	0	221	0.0007

## Sheet: Fig 5E
Figure	Parameter measured	Genotype	Number of independent cultures	Number of observations	Mean	SEM
5E	# of docked SV (x-axis)	WT	3	148	0.9669	0.08886
		∆N2-28	2	141	0.8732	0.09421
		LEOpen	3	142	0.9929	0.1068
		LEOpen + ΔN2-28	2	112	0.4464	0.06928
		STX1-null	2	92	0.4536	0.0803
	RRP total charge (nm) (y-axis)	WT	11	102	0.4515	0.03701
		∆N2-28	6	49	0.3448	0.04292
		LEOpen	7	60	0.3179	0.04802
		LEOpen + ΔN2-28	7	61	0.1992	0.02559
		STX1-null	8	44	0.001926	0.001328

## Sheet: Fig 5F
Figure	Parameter measured	Distance from AZ (nm) (x-axis)	Statistical test	Number of independent cultures	Number of observations	Mean	SEM	Number of observations	Mean	SEM	Adjusted p-value
					WT			∆N2-28
5F	SV distribution	0	Multiple t-tests	2	96	0.864583	0.0989194	142	0.880282	0.0961149	0.9123
		5				0.5625	0.0822017		0.908451	0.0931716	0.0093
		10				0.65625	0.0795107		0.591549	0.0671605	0.5369
		15				0.375	0.0596959		0.380282	0.0563006	0.9501
		20				0.28125	0.0605224		0.302817	0.0457891	0.773
		25				0.385417	0.0634702		0.359155	0.0522604	0.7498
		30				0.375	0.0615052		0.302817	0.047921	0.3505
		35				0.447917	0.0723506		0.43662	0.0551646	0.8998
		40				0.46875	0.0709477		0.492958	0.0571931	0.79
		45				0.53125	0.0850092		0.626761	0.0636903	0.3609
		50				0.604167	0.0953746		0.640845	0.0702049	0.752
		55				0.604167	0.079028		0.626761	0.0703951	0.8337
		60				0.572917	0.0721609		0.535211	0.0535075	0.6689
		65				0.510417	0.076941		0.676056	0.0717584	0.1257
		70				0.833333	0.0932675		0.690141	0.0742445	0.228
		75				0.760417	0.0780025		0.633803	0.0710094	0.2404
		80				0.65625	0.080878		0.556338	0.0628341	0.325
		85				0.8125	0.0867449		0.809859	0.0780168	0.9823
		90				0.802083	0.0908293		0.690141	0.0679208	0.3158
		95				0.791667	0.0875052		0.676056	0.0667086	0.2874
		100				0.770833	0.0894417		0.711268	0.0758404	0.6141

## Sheet: Fig 5G
Figure	Parameter measured	Distance from AZ (nm) (x-axis)	Statistical test	Number of independent cultures	Number of observations	Mean	SEM	Number of observations	Mean	SEM	Adjusted p-value
					WT			LEOpen
5G	SV distribution	0	Multiple t-tests	3	148	0.972973	0.090425	141	0.992908	0.106761	0.8864
		5				0.554054	0.0679891		0.765957	0.0764182	0.0388
		10				0.709459	0.0768552		0.468085	0.0679361	0.0197
		15				0.398649	0.0495798		0.404255	0.059531	0.9421
		20				0.324324	0.0518248		0.361702	0.054463	0.6192
		25				0.371622	0.050988		0.460993	0.0693856	0.2969
		30				0.324324	0.0471822		0.567376	0.0639029	0.0023
		35				0.47973	0.0579017		0.425532	0.0525288	0.49
		40				0.506757	0.0617635		0.425532	0.0553464	0.3298
		45				0.547297	0.0652646		0.673759	0.0749849	0.2031
		50				0.614865	0.0739725		0.666667	0.0737384	0.6205
		55				0.560811	0.0623042		0.70922	0.0763524	0.1315
		60				0.560811	0.0600502		0.617021	0.0641834	0.5226
		65				0.5	0.0594916		0.687943	0.079343	0.0575
		70				0.77027	0.0678611		0.744681	0.0735579	0.7981
		75				0.736486	0.0638599		0.808511	0.0817209	0.4856
		80				0.716216	0.0779167		0.70922	0.0648738	0.9453
		85				0.804054	0.0715307		0.758865	0.0732103	0.6592
		90				0.72973	0.0758567		0.886525	0.0824475	0.1621
		95				0.75	0.0683877		0.822695	0.0775013	0.4814
		100				0.804054	0.0728045		0.822695	0.0748411	0.8584

## Sheet: Fig 5H
Figure	Parameter measured	Distance from AZ (nm) (x-axis)	Statistical test	Number of independent cultures	Number of observations	Mean	SEM	Number of observations	Mean	SEM	Adjusted p-value
					WT			LEOpen + ∆N2-28
5H	SV distribution	0	Multiple t-tests	2	96	0.864583	0.0989194	112	0.446429	0.0692849	0.0005
		5				0.5625	0.0822017		0.214286	0.0514096	0.0003
		10				0.65625	0.0795107		0.383929	0.0662052	0.0086
		15				0.375	0.0596959		0.392857	0.0675423	0.8455
		20				0.28125	0.0605224		0.294643	0.0532689	0.8677
		25				0.385417	0.0634702		0.330357	0.0528901	0.5024
		30				0.375	0.0615052		0.214286	0.0481788	0.0384
		35				0.447917	0.0723506		0.321429	0.0526246	0.1514
		40				0.46875	0.0709477		0.392857	0.0625976	0.4217
		45				0.53125	0.0850092		0.232143	0.0507063	0.0021
		50				0.604167	0.0953746		0.491071	0.0659008	0.3198
		55				0.604167	0.079028		0.491071	0.0621312	0.2559
		60				0.572917	0.0721609		0.535714	0.0693885	0.7114
		65				0.510417	0.076941		0.696429	0.0726844	0.0808
		70				0.833333	0.0932675		0.4375	0.0605387	0.0003
		75				0.760417	0.0780025		0.598214	0.0765864	0.1412
		80				0.65625	0.080878		0.482143	0.0621139	0.0848
		85				0.8125	0.0867449		0.589286	0.0723675	0.0477
		90				0.802083	0.0908293		0.598214	0.0755288	0.0833
		95				0.791667	0.0875052		0.776786	0.0929547	0.9083
		100				0.770833	0.0894417		0.598214	0.0722633	0.1308
