# Supplementary material for: Reexamination of N-terminal domains of syntaxin-1 in vesicle fusion from central murine synapses
Source: eLife. 2021 Aug 24;10:e69498. doi: 10.7554/eLife.69498 (PMC8416022; doi:10.7554/eLife.69498)
Supplement: Figure 6—figure supplement 1—source data 1. [file elife-69498-fig6-figsupp1-data1.xlsx]

## Sheet: Figure 6-supplement 1A
Figure	Parameter measured	Stimulus number (x-axis)	Statistical test	Number of independent cultures	Number of observations	Mean	SEM	Number of observations	Mean	SEM	Adjusted p-value (vs WT)	Number of observations	Mean	SEM	Adjusted p-value (vs WT)	Number of observations	Mean	SEM	Adjusted p-value (vs WT)
					WT			∆N2-9				∆N2-19				∆N2-28
Figure 6-supplement 1A	EPSC(X) (nA)	1	Mixed effect analysis	6	45	4.13748	0.555355	46	4.05929	0.554183	0.9996	42	2.99634	0.331756	0.2991	43	2.4375	0.35787	0.0572
		2	Followed by Tukey's post-hoc			3.54894	0.438461		3.52801	0.446895	>0.9999		2.68937	0.255327	0.3345		2.24085	0.283068	0.0671
		3				3.17309	0.385206		3.20098	0.385884	>0.9999		2.46463	0.220975	0.388		2.00047	0.250565	0.0602
		4				2.93048	0.341798		2.90163	0.343163	>0.9999		2.25393	0.20099	0.3281		1.87788	0.231152	0.0601
		5				2.78499	0.329714		2.82538	0.325841	0.9998		2.18641	0.18581	0.3957		1.77205	0.221711	0.0604
		6				2.6884	0.322603		2.77723	0.319824	0.9973		2.0989	0.17519	0.3823		1.72393	0.211353	0.0679
		7				2.61155	0.309088		2.77516	0.313272	0.9824		2.04552	0.175197	0.3892		1.66345	0.20292	0.0583
		8				2.58379	0.309369		2.68985	0.310276	0.995		2.05163	0.171786	0.4408		1.66504	0.210466	0.0753
		9				2.57274	0.314402		2.75874	0.313682	0.9751		2.06235	0.173728	0.4909		1.64637	0.208697	0.0756
		10				2.52267	0.300576		2.7326	0.320342	0.9638		2.01595	0.176404	0.4706		1.65032	0.201685	0.0837
		11				2.51482	0.308579		2.79595	0.326281	0.9235		2.06866	0.176854	0.5947		1.65258	0.204372	0.1004
		12				2.51884	0.307697		2.76227	0.327134	0.9484		2.04657	0.178464	0.5486		1.6059	0.205158	0.0732
		13				2.51917	0.312459		2.75229	0.326254	0.955		2.02747	0.165944	0.5101		1.64935	0.207661	0.1028
		14				2.47292	0.307819		2.80212	0.330139	0.8851		2.03586	0.174544	0.6069		1.60289	0.208642	0.098
		15				2.48417	0.306126		2.77489	0.324426	0.9147		2.0296	0.171982	0.5695		1.63341	0.207822	0.1071
		16				2.47801	0.309684		2.80415	0.326012	0.8867		2.07087	0.173404	0.6619		1.6345	0.215901	0.1231
		17				2.45939	0.301138		2.81763	0.334352	0.856		2.05688	0.17601	0.6576		1.60175	0.208617	0.0976
		18				2.45282	0.302706		2.82987	0.331429	0.8352		2.06344	0.177899	0.6852		1.60163	0.206695	0.1019
		19				2.48665	0.303059		2.84488	0.341799	0.8614		2.03448	0.174977	0.571		1.63489	0.209295	0.104
		20				2.45579	0.301983		2.8357	0.331741	0.8319		2.07089	0.174476	0.6885		1.6151	0.210114	0.1104
		21				2.44301	0.30313		2.84834	0.342957	0.8124		2.06281	0.171192	0.6955		1.65207	0.210125	0.1484
		22				2.42797	0.305117		2.81148	0.334185	0.8315		2.07503	0.172228	0.7457		1.65956	0.222211	0.1837
		23				2.4306	0.299395		2.80074	0.335678	0.8435		2.04708	0.168035	0.6803		1.65934	0.211433	0.1608
		24				2.46316	0.307045		2.82895	0.340505	0.8552		2.04333	0.163415	0.6246		1.67238	0.218731	0.1629
		25				2.43308	0.300819		2.75863	0.334604	0.8875		2.07508	0.168601	0.7277		1.64932	0.214583	0.1554
		26				2.40508	0.300855		2.84259	0.34634	0.7759		2.06793	0.17209	0.7653		1.62522	0.218382	0.1627
		27				2.45573	0.306527		2.79854	0.341394	0.8776		2.0598	0.175026	0.6775		1.62289	0.21364	0.1245
		28				2.39792	0.296053		2.80929	0.338956	0.7974		2.05119	0.168334	0.7394		1.64918	0.215392	0.1804
		29				2.3763	0.293869		2.83711	0.335324	0.7303		2.06313	0.171607	0.7941		1.65951	0.216736	0.2107
		30				2.39128	0.298901		2.85645	0.353005	0.7465		2.07837	0.170649	0.8		1.66954	0.21466	0.2115
		31				2.41298	0.298158		2.81396	0.338134	0.8103		2.04491	0.168049	0.7056		1.6607	0.217951	0.1833
		32				2.39538	0.293596		2.79207	0.333899	0.8089		2.06318	0.164664	0.7574		1.64267	0.207934	0.1646
		33				2.41338	0.296999		2.82264	0.338825	0.8005		2.06688	0.167006	0.7401		1.63579	0.214348	0.1547
		34				2.37174	0.293346		2.82309	0.344821	0.7515		2.05536	0.167128	0.785		1.6559	0.21074	0.2036
		35				2.40401	0.296674		2.82637	0.342147	0.7874		2.06108	0.167632	0.7462		1.63739	0.208528	0.1577
		36				2.37165	0.296113		2.79629	0.33768	0.7804		2.0571	0.157622	0.7847		1.67683	0.215569	0.2376
		37				2.36014	0.290913		2.79984	0.33148	0.7515		2.09148	0.173193	0.8572		1.66779	0.222316	0.24
		38				2.36906	0.2912		2.77092	0.336008	0.8028		2.08178	0.157499	0.8214		1.67568	0.210757	0.2244
		39				2.36464	0.287055		2.8119	0.342175	0.749		2.0756	0.165826	0.8193		1.6201	0.211443	0.1657
		40				2.3501	0.286071		2.7735	0.338698	0.7752		2.07056	0.165648	0.8324		1.69341	0.217446	0.268
		41				2.3004	0.278365		2.73995	0.333336	0.7428		2.02727	0.164198	0.8327		1.67789	0.221554	0.305
		42				2.31677	0.289558		2.77923	0.338741	0.7278		2.02563	0.157278	0.8134		1.67318	0.228645	0.3077
		43				2.3289	0.287691		2.77616	0.338659	0.746		2.12446	0.171652	0.9285		1.67488	0.220451	0.2787
		44				2.30775	0.280346		2.76087	0.334512	0.7276		2.01754	0.160576	0.8057		1.6787	0.211487	0.285
		45				2.33729	0.289619		2.75629	0.339667	0.7842		2.05744	0.166433	0.8363		1.68941	0.215059	0.2828
		46				2.28499	0.278413		2.74348	0.333093	0.7169		2.04192	0.161388	0.8741		1.66291	0.222087	0.3065
		47				2.29702	0.277296		2.72006	0.332713	0.763		2.0473	0.163333	0.8651		1.68366	0.216475	0.3081
		48				2.29538	0.287858		2.73474	0.330203	0.7481		2.04624	0.158401	0.8728		1.70068	0.214822	0.3538
		49				2.2997	0.28353		2.7963	0.333575	0.6694		2.08039	0.164111	0.9082		1.69603	0.22067	0.3407
		50				2.27706	0.275935		2.73573	0.333476	0.7148		2.03686	0.157323	0.8737		1.66134	0.217259	0.3033

## Sheet: Figure 6-supplement 1B
Figure	Parameter measured	Statistical test	Genotype	Number of independent cultures	Number of observations	Parametric distribution 'Kolmogorov - Smirnov test'	Mean	SEM	Median	Mean ranks	Adjusted p-value (vs WT)
Figure 6-supplement 1B	EPSC Amplitude (norm. to [Ca2+]e 10) [Ca2+]e 0.5 mM	Kruskal-Wallis Dunn's post-hoc	WT	3	40	Yes	0.107392	0.00953237	0.0978362	95.1
		with the data in Fig 6D	∆N2-19	3	40	No	0.0894	0.01195	0.07047	76.13	0.3329
	EPSC Amplitude (norm. to [Ca2+]e 10) [Ca2+]e 1 mM	Kruskal-Wallis Dunn's post-hoc	WT	3	41	Yes	0.37892	0.0216193	0.366273	94.24
		with the data in Fig 6D	∆N2-19	3	40	Yes	0.3129	0.02164	0.2897	68.88	0.0659
	EPSC Amplitude (norm. to [Ca2+]e 10) [Ca2+]e 2 mM	Kruskal-Wallis Dunn's post-hoc	WT	3	41	Yes	0.736266	0.0247016	0.712528	98.76
		with the data in Fig 6D	∆N2-19	3	40	Yes	0.6407	0.02741	0.6289	72	0.0439
	EPSC Amplitude (norm. to [Ca2+]e 10) [Ca2+]e 4 mM	Kruskal-Wallis Dunn's post-hoc	WT	3	41	Yes	1.01531	0.0347279	0.970427	88.73
		with the data in Fig 6D	∆N2-19	3	40	Yes	0.95	0.03441	0.9117	74.25	0.864

## Sheet: Figure 6-supplement 1C
Figure	Parameter measured	Statistical test	Genotype	Number of independent cultures	Number of observations	Mean	Adjusted p-value (vs WT)
Figure 6-supplement 1C	EPSC2/EPSC1 [Ca2+]e 0.5 mM	two-way ANOVA (of the means of the responses)	WT	3	39	2.104
			∆N2-9	3	34	2.391	0.1716
			∆N2-28	3	34	2.531	0.0099
	EPSC2/EPSC1 [Ca2+]e 2 mM	two-way ANOVA (of the means of the responses)	WT	3	41	0.732
			∆N2-9	3	36	0.75	0.7632
			∆N2-28	3	38	0.8234	0.0009
	EPSC2/EPSC1 [Ca2+]e 10 mM	two-way ANOVA (of the means of the responses)	WT	3	41	0.4988
			∆N2-9	3	36	0.4804	0.8293
			∆N2-28	3	38	0.5203	0.7562

## Sheet: Figure 6-supplement 1D
Figure	Parameter measured	Stimulus number (x-axis)	Statistical test	Number of independent cultures	Number of observations	Mean	SEM	Number of observations	Mean	SEM	Adjusted p-value (vs WT)	Number of observations	Mean	SEM	Adjusted p-value (vs WT)	Adjusted p-value (vs LEOpen)	Number of observations	Mean	SEM	Adjusted p-value (vs WT)	Adjusted p-value (vs LEOpen)	Number of observations	Mean	SEM	Adjusted p-value (vs WT)	Adjusted p-value (vs LEOpen)
					WT			LEOpen				LEOpen + ∆N2-9					LEOpen + ∆N2-19					LEOpen + ∆N2-28
Figure 6-supplement 1D	EPSC(X) (nA)	1	Mixed effect analysis	5	42	2.81478	0.451409	30	3.86862	0.591392	0.6197	38	2.30483	0.346902	0.8976	0.1689	40	2.43606	0.352609	0.964	0.2449	36	1.9204	0.379312	0.5549	0.0572
		2	Followed by Tukey's post-hoc			2.37681	0.320061		2.57457	0.406694	0.9954		1.64732	0.22813	0.3503	0.2875		1.83626	0.262064	0.6879	0.5507		1.47278	0.240109	0.1701	0.1524
		3				2.06002	0.275944		1.99264	0.334064	0.9999		1.30827	0.175952	0.1584	0.3793		1.46726	0.197159	0.4117	0.6591		1.23333	0.198927	0.119	0.3043
		4				1.81	0.241716		1.6097	0.273893	0.9818		1.10601	0.150347	0.109	0.4975		1.25211	0.164101	0.3218	0.7953		1.02095	0.171518	0.07	0.3728
		5				1.72144	0.230025		1.37868	0.247257	0.8476		0.974684	0.128918	0.047	0.6002		1.10595	0.142381	0.1657	0.8732		0.926901	0.145443	0.0371	0.5204
		6				1.66178	0.229723		1.22947	0.209562	0.6359		0.883935	0.114742	0.0287	0.6017		0.972631	0.128514	0.079	0.8332		0.797845	0.124734	0.0132	0.4026
		7				1.57882	0.215896		1.18992	0.21785	0.7115		0.806002	0.102602	0.0166	0.5093		0.8906	0.112187	0.0478	0.739		0.76136	0.124418	0.014	0.4389
		8				1.54136	0.218792		1.05648	0.183636	0.4422		0.755841	0.0941283	0.0141	0.5952		0.828374	0.112546	0.0402	0.8263		0.688864	0.112064	0.0083	0.4382
		9				1.52079	0.214259		1.05133	0.194524	0.4885		0.705808	0.0891138	0.0077	0.4967		0.781728	0.101151	0.0227	0.7343		0.65738	0.110764	0.0059	0.4087
		10				1.50141	0.215717		1.06069	0.174827	0.5105		0.660353	0.083681	0.0055	0.254		0.692632	0.0866263	0.0085	0.3399		0.577627	0.0917086	0.0021	0.1219
		11				1.50933	0.214019		1.03174	0.171022	0.4148		0.593519	0.0732843	0.0016	0.1493		0.690206	0.0888812	0.0072	0.4023		0.590902	0.0955346	0.0022	0.1799
		12				1.48685	0.213693		0.97103	0.169322	0.3313		0.580541	0.0689286	0.0017	0.2261		0.630163	0.0806747	0.0039	0.3774		0.557943	0.0939174	0.0018	0.2238
		13				1.50051	0.219939		0.984661	0.161647	0.3325		0.574438	0.0702502	0.0018	0.1575		0.612325	0.077215	0.0033	0.2483		0.522865	0.0839775	0.0011	0.1011
		14				1.48557	0.216346		0.94861	0.150629	0.2599		0.547101	0.0682698	0.0012	0.1284		0.578526	0.0700747	0.002	0.1899		0.506894	0.0921366	0.001	0.1068
		15				1.48188	0.215292		0.923585	0.152006	0.2243		0.525545	0.0636277	0.0009	0.1326		0.550909	0.0653239	0.0013	0.182		0.508369	0.089177	0.001	0.1455
		16				1.45896	0.207638		0.925763	0.15126	0.2424		0.501838	0.0589613	0.0005	0.0885		0.531377	0.0611327	0.0008	0.1324		0.43923	0.0741913	0.0002	0.0454
		17				1.45092	0.212578		0.91854	0.152937	0.2616		0.489873	0.0584779	0.0006	0.0873		0.533086	0.0703484	0.0014	0.1688		0.466306	0.0827226	0.0006	0.0871
		18				1.46092	0.213021		0.922446	0.147851	0.2421		0.471337	0.0557903	0.0004	0.0513		0.52828	0.0612724	0.001	0.1204		0.44435	0.0790665	0.0004	0.0488
		19				1.44786	0.213722		0.90082	0.143888	0.2225		0.48915	0.0548748	0.0007	0.0774		0.492483	0.0640098	0.0008	0.0907		0.448131	0.0798353	0.0005	0.0616
		20				1.41288	0.204687		0.884157	0.14269	0.2241		0.45558	0.0541837	0.0004	0.0571		0.471624	0.0574029	0.0005	0.0754		0.419275	0.0722989	0.0003	0.0432
		21				1.4236	0.208377		0.932456	0.156387	0.3349		0.460591	0.0550538	0.0005	0.0529		0.465261	0.0534578	0.0005	0.0554		0.437094	0.0766339	0.0004	0.0504
		22				1.39509	0.207696		0.894228	0.138415	0.2741		0.467755	0.0582531	0.0008	0.0523		0.454137	0.05133	0.0006	0.0381		0.423462	0.0760312	0.0005	0.0353
		23				1.38941	0.204776		0.91852	0.145297	0.3403		0.429961	0.0525509	0.0004	0.0246		0.463155	0.0573046	0.0006	0.0442		0.433618	0.0784642	0.0006	0.0396
		24				1.36392	0.196172		0.884604	0.145387	0.2949		0.441558	0.0561796	0.0004	0.0526		0.473546	0.0588506	0.0007	0.0863		0.41329	0.075432	0.0003	0.0461
		25				1.39707	0.209349		0.892315	0.140913	0.2772		0.433318	0.0529433	0.0005	0.0323		0.432974	0.0516387	0.0005	0.0315		0.418325	0.0777234	0.0005	0.0386
		26				1.37662	0.203153		0.887493	0.136525	0.2781		0.414365	0.049739	0.0003	0.0193		0.446279	0.0470157	0.0005	0.0322		0.405474	0.0776929	0.0004	0.0281
		27				1.39214	0.202071		0.89138	0.141113	0.2622		0.419248	0.0515414	0.0002	0.0257		0.453176	0.0583971	0.0005	0.0489		0.414239	0.0736536	0.0003	0.0343
		28				1.3756	0.200717		0.917563	0.144681	0.3534		0.434314	0.053317	0.0004	0.0262		0.457128	0.0617787	0.0006	0.0424		0.419834	0.0764151	0.0004	0.0306
		29				1.37663	0.193413		0.889162	0.150721	0.2826		0.422123	0.0529661	0.0002	0.0441		0.429586	0.0529409	0.0002	0.0492		0.402202	0.071436	0.0002	0.0424
		30				1.34721	0.195844		0.91146	0.145021	0.3887		0.413032	0.0491538	0.0003	0.0197		0.448125	0.0573881	0.0005	0.0387		0.387265	0.0693514	0.0002	0.0178
		31				1.35317	0.200769		0.880861	0.146737	0.3275		0.427889	0.0516689	0.0005	0.0453		0.425253	0.0504499	0.0004	0.0429		0.387113	0.066874	0.0003	0.0301
		32				1.3937	0.205506		0.887493	0.141437	0.2635		0.412406	0.0509182	0.0003	0.0247		0.446874	0.0552614	0.0005	0.0457		0.396251	0.0769252	0.0003	0.0297
		33				1.34992	0.197086		0.886985	0.142673	0.3258		0.423023	0.0537239	0.0004	0.0327		0.441152	0.056783	0.0005	0.0454		0.40817	0.0765587	0.0004	0.0377
		34				1.38312	0.199007		0.905722	0.145206	0.3076		0.414044	0.0534379	0.0002	0.0235		0.441503	0.0533307	0.0003	0.0364		0.379636	0.0685253	0.0002	0.0172
		35				1.31551	0.192099		0.870607	0.135019	0.33		0.401082	0.0474745	0.0003	0.0183		0.439199	0.0539155	0.0006	0.0389		0.407831	0.0764445	0.0005	0.035
		36				1.33705	0.194042		0.900616	0.142921	0.3757		0.419136	0.0529982	0.0003	0.0247		0.438054	0.0515683	0.0004	0.0329		0.390554	0.0674678	0.0003	0.0195
		37				1.32446	0.194634		0.902345	0.14784	0.4245		0.397597	0.0468175	0.0003	0.02		0.447332	0.0531292	0.0007	0.0469		0.395844	0.0728013	0.0004	0.0287
		38				1.33964	0.195074		0.859743	0.14091	0.2798		0.415152	0.0535675	0.0003	0.041		0.42806	0.0526683	0.0004	0.0496		0.388452	0.0647797	0.0002	0.0318
		39				1.33786	0.195202		0.875551	0.142524	0.3205		0.427038	0.054162	0.0004	0.0418		0.426824	0.053054	0.0004	0.041		0.371227	0.06362	0.0002	0.0196
		40				1.30281	0.194015		0.877301	0.136173	0.3848		0.419088	0.0507202	0.0006	0.025		0.431173	0.0536146	0.0007	0.032		0.392131	0.0677103	0.0005	0.0212
		41				1.31505	0.192797		0.865602	0.133643	0.319		0.401596	0.0504322	0.0003	0.0196		0.453267	0.0580977	0.0008	0.0533		0.394861	0.0794262	0.0005	0.0308
		42				1.3141	0.190223		0.897605	0.143529	0.4122		0.408567	0.0528672	0.0003	0.0224		0.439977	0.0568494	0.0005	0.0393		0.394979	0.0730643	0.0003	0.0252
		43				1.31897	0.190704		0.859783	0.132541	0.2881		0.426813	0.0524169	0.0004	0.0329		0.443151	0.0590526	0.0006	0.048		0.394199	0.0701292	0.0003	0.026
		44				1.28152	0.187818		0.848634	0.14043	0.3562		0.417497	0.0520038	0.0005	0.0486		0.433996	0.053584	0.0007	0.0639		0.380331	0.0722338	0.0004	0.0372
		45				1.26681	0.185882		0.923972	0.13751	0.577		0.408808	0.0497383	0.0005	0.0096		0.434896	0.0529253	0.0008	0.0162		0.386316	0.0692139	0.0004	0.0094
		46				1.27715	0.190738		0.895815	0.144311	0.5061		0.399042	0.0515146	0.0005	0.0201		0.43192	0.0519707	0.0008	0.0345		0.379568	0.0716539	0.0005	0.0204
		47				1.27603	0.191593		0.867962	0.138818	0.4259		0.408173	0.0535611	0.0006	0.029		0.4139	0.0504184	0.0007	0.0305		0.390436	0.0706985	0.0006	0.0291
		48				1.26461	0.187791		0.870627	0.133685	0.4353		0.403451	0.0514602	0.0005	0.0188		0.421636	0.0491418	0.0007	0.0251		0.377483	0.0717643	0.0005	0.0177
		49				1.28069	0.186105		0.85783	0.135631	0.3616		0.412277	0.0526138	0.0004	0.031		0.440908	0.0537376	0.0007	0.0506		0.383841	0.0714831	0.0004	0.0269
		50				1.24544	0.183792		0.874045	0.143749	0.5078		0.393388	0.0452631	0.0004	0.0236		0.448171	0.0570888	0.0013	0.0643		0.386485	0.0721729	0.0006	0.0318

## Sheet: Figure 6-supplement 1E
Figure	Parameter measured	Statistical test	Genotype	Number of independent cultures	Number of observations	Parametric distribution 'Kolmogorov - Smirnov test'	Mean	SEM	Median	Adjusted p-value (vs WT)	Adjusted p-value (vs LEOpen)
Figure 6-supplement 1E	EPSC Amplitude (norm. to [Ca2+]e 10) [Ca2+]e 0.5 mM	one-way ANOVA; Holm Sidak's post-hoc	WT	2	23	Yes	0.1064	0.01473	0.09271		<0.0001
		with the data in Fig 6I	LEOpen	2	23	Yes	0.2864	0.02868	0.2887	<0.0001
			LEOpen + ∆N2-19	2	22	Yes	0.1474	0.0186	0.1494	0.6949	0.0004
	EPSC Amplitude (norm. to [Ca2+]e 10) [Ca2+]e 1 mM	one-way ANOVA; Holm Sidak's post-hoc	WT	2	23	Yes	0.313	0.02792	0.2957		<0.0001
		with the data in Fig 6I	LEOpen	2	23	Yes	0.6118	0.04149	0.6016	<0.0001
			LEOpen + ∆N2-19	2	22	Yes	0.4248	0.02991	0.4071	0.1221	0.002
	EPSC Amplitude (norm. to [Ca2+]e 10) [Ca2+]e 2 mM	one-way ANOVA; Holm Sidak's post-hoc	WT	2	23	Yes	0.6954	0.03664	0.7117		0.0012
		with the data in Fig 6I	LEOpen	2	23	Yes	0.9355	0.04643	1.012	0.0012
			LEOpen + ∆N2-19	2	22	Yes	0.792	0.04503	0.8047	0.5067	0.1955
	EPSC Amplitude (norm. to [Ca2+]e 10) [Ca2+]e 4 mM	one-way ANOVA; Holm Sidak's post-hoc	WT	2	23	Yes	0.9786	0.04892	0.9857		0.8375
		with the data in Fig 6I	LEOpen	2	23	Yes	1.046	0.03793	1.051	0.8375
			LEOpen + ∆N2-19	2	22	Yes	0.9776	0.04552	0.9982	0.9994	0.959

## Sheet: Figure 6-supplement 1F
Figure	Parameter measured	Statistical test	Genotype	Number of independent cultures	Number of observations	Parametric distribution 'Kolmogorov - Smirnov test'	Mean	SEM	Median	Mean ranks	Adjusted p-value (vs WT)	Adjusted p-value (vs LEOpen)
Figure 6-supplement 1F	EPSC2/EPSC1 [Ca2+]e 0.5 mM	two-way ANOVA (of the means of the responses)	WT	2	22		1.976					<0.0001
			LEOpen	2	23		1.047				<0.0001
			LEOpen + ∆N2-9	2	19		1.91				0.9685	<0.0001
			LEOpen + ∆N2-28	2	19		1.669				0.2925	0.0005
	EPSC2/EPSC1 [Ca2+]e 2 mM	two-way ANOVA (of the means of the responses)	WT	2	23		0.7455					<0.0001
			LEOpen	2	23		0.4651				<0.0001
			LEOpen + ∆N2-9	2	22		0.6049				0.0006	0.0031
			LEOpen + ∆N2-28	2	23		0.5682				0.0001	0.1027
	EPSC2/EPSC1 [Ca2+]e 10 mM	two-way ANOVA (of the means of the responses)	WT	2	23		0.4959					0.0072
			LEOpen	2	23		0.3606				0.0072
			LEOpen + ∆N2-9	2	22		0.4143				0.1994	0.6244
			LEOpen + ∆N2-28	2	23		0.3958				0.0765	0.8604
