# Supplementary material for: Reexamination of N-terminal domains of syntaxin-1 in vesicle fusion from central murine synapses
Source: eLife. 2021 Aug 24;10:e69498. doi: 10.7554/eLife.69498 (PMC8416022; doi:10.7554/eLife.69498)
Supplement: Figure 6—source data 1. [file elife-69498-fig6-data1.xlsx]

## Sheet: Fig 6A
Figure	Parameter measured	Stimulus number (x-axis)	Statistical test	Number of independent cultures	Number of observations	Mean	SEM	Number of observations	Mean	SEM	Adjusted p-value (vs WT)	Number of observations	Mean	SEM	Adjusted p-value (vs WT)	Number of observations	Mean	SEM	Adjusted p-value (vs WT)
					WT			∆N2-9				∆N2-19				∆N2-28
6A	EPSC(X)/EPSC(1)	1	Mixed effect analysis	6	45	1	0	46	1	0		42	1	0		43	1	0
		2	Followed by Tukey's post-hoc			0.914047	0.0293875		0.905027	0.0251505	0.9955		1.00801	0.0422949	0.2702		1.07261	0.0508551	0.0425
		3				0.842468	0.0392558		0.861962	0.0281795	0.9776		0.974262	0.0534468	0.2017		0.985321	0.0550802	0.1585
		4				0.807386	0.0388967		0.789707	0.0305766	0.9843		0.894151	0.0505601	0.5279		0.932477	0.0516462	0.222
		5				0.749116	0.0329012		0.794887	0.0335765	0.7648		0.893577	0.0512724	0.0921		0.876997	0.0538116	0.1878
		6				0.716074	0.0305273		0.777746	0.036409	0.5667		0.860724	0.0504889	0.0771		0.855541	0.0502957	0.0924
		7				0.716408	0.0407398		0.79107	0.0400212	0.5607		0.867764	0.0650041	0.2081		0.851074	0.0619295	0.2739
		8				0.732706	0.048611		0.763009	0.0362771	0.9589		0.868678	0.060276	0.3022		0.822167	0.0513645	0.5876
		9				0.693539	0.047396		0.792684	0.0486837	0.4664		0.865676	0.0570612	0.1018		0.826104	0.0579041	0.2944
		10				0.697424	0.0453954		0.775145	0.0408702	0.5828		0.835242	0.0588321	0.2561		0.861463	0.0599105	0.1371
		11				0.66847	0.0367962		0.791166	0.0412342	0.1258		0.861101	0.056467	0.028		0.84987	0.0588915	0.0524
		12				0.686464	0.0408869		0.779907	0.0416243	0.383		0.867633	0.0624519	0.0811		0.839034	0.0631216	0.1871
		13				0.674928	0.0383633		0.775435	0.0422293	0.2987		0.882182	0.0694149	0.0531		0.841568	0.0597154	0.0968
		14				0.647875	0.0393794		0.799935	0.0450108	0.0604		0.87223	0.0674023	0.0272		0.800267	0.0576452	0.1374
		15				0.697817	0.0472405		0.807492	0.0483536	0.3714		0.867533	0.0690557	0.187		0.858185	0.0653609	0.2012
		16				0.66984	0.0483876		0.815771	0.0497619	0.1603		0.886755	0.0633988	0.0394		0.814021	0.0554035	0.2115
		17				0.673877	0.0435715		0.804286	0.0471107	0.1841		0.861219	0.0594891	0.0617		0.815387	0.0538255	0.1808
		18				0.664301	0.0393299		0.805714	0.046693	0.1022		0.873155	0.0614289	0.0276		0.807347	0.0583038	0.185
		19				0.675471	0.0390975		0.821643	0.0539357	0.1335		0.856265	0.0580392	0.056		0.847024	0.0635938	0.1083
		20				0.659161	0.0374253		0.823738	0.0531656	0.0626		0.893817	0.067275	0.0171		0.843131	0.0696837	0.1027
		21				0.664752	0.0408075		0.817832	0.0523298	0.1046		0.883436	0.0611534	0.0204		0.869114	0.0669254	0.0531
		22				0.657579	0.0407028		0.805767	0.0475277	0.091		0.889928	0.0646812	0.0171		0.850667	0.0606625	0.0482
		23				0.665443	0.0417642		0.812993	0.0534861	0.1388		0.881809	0.0646915	0.0318		0.862007	0.0640427	0.0577
		24				0.672469	0.0455639		0.816505	0.0554768	0.1937		0.883777	0.0620949	0.0372		0.866305	0.0653746	0.0796
		25				0.665193	0.0418755		0.795221	0.0491402	0.1908		0.889409	0.0661062	0.0275		0.86683	0.0693398	0.0705
		26				0.643622	0.0436959		0.814713	0.0545151	0.0757		0.887526	0.066554	0.0159		0.835906	0.065362	0.0774
		27				0.655528	0.0398162		0.809505	0.053456	0.104		0.874042	0.0617582	0.0205		0.828953	0.0606841	0.0881
		28				0.670402	0.0478666		0.810726	0.0516401	0.1984		0.886782	0.0635617	0.0395		0.847875	0.0644167	0.1291
		29				0.658318	0.0436978		0.828277	0.055391	0.0831		0.884109	0.0611756	0.0186		0.874206	0.0671377	0.0425
		30				0.656889	0.0461972		0.808744	0.0506773	0.1273		0.905355	0.0686807	0.0189		0.878082	0.0699092	0.0487
		31				0.648627	0.0388866		0.821353	0.0554822	0.06		0.879637	0.0637391	0.0148		0.863548	0.0628143	0.0245
		32				0.64693	0.0422521		0.807199	0.0514732	0.0834		0.897024	0.0664371	0.0116		0.874405	0.0675676	0.0282
		33				0.655826	0.0409772		0.832336	0.056484	0.0628		0.894486	0.0639907	0.0129		0.839999	0.0643804	0.0836
		34				0.660399	0.0496379		0.813412	0.0533789	0.1614		0.877216	0.0595626	0.0321		0.866068	0.0663277	0.0705
		35				0.681337	0.0532642		0.82107	0.0541748	0.2621		0.891377	0.0647874	0.0668		0.871473	0.0686864	0.1355
		36				0.654236	0.0477844		0.820288	0.0551234	0.1115		0.904406	0.0649259	0.014		0.881381	0.0677879	0.0377
		37				0.648167	0.0411776		0.818978	0.05398	0.0647		0.891811	0.0627108	0.0094		0.85707	0.0689171	0.0539
		38				0.658513	0.0455319		0.805766	0.0532254	0.1605		0.913146	0.0675886	0.0133		0.902972	0.0695933	0.0224
		39				0.65463	0.0437298		0.820811	0.0559539	0.0971		0.881746	0.0555043	0.01		0.843737	0.0636887	0.0769
		40				0.666016	0.0474547		0.798907	0.0526634	0.2464		0.895212	0.062348	0.0229		0.904534	0.0689717	0.0283
		41				0.636787	0.0416843		0.803409	0.0530601	0.0722		0.868945	0.0591038	0.0103		0.883176	0.0687542	0.016
		42				0.640148	0.0454678		0.807529	0.0566967	0.1054		0.88448	0.0606992	0.0099		0.85516	0.0728878	0.0681
		43				0.648859	0.0426252		0.810157	0.0569956	0.1144		0.914846	0.0667154	0.0068		0.86211	0.0673367	0.0447
		44				0.655678	0.0509406		0.807081	0.0565381	0.1998		0.866299	0.0581732	0.0386		0.908957	0.0701174	0.0231
		45				0.654589	0.0471431		0.808008	0.0604521	0.1957		0.874431	0.0552993	0.0171		0.91485	0.0726527	0.0187
		46				0.637125	0.0409322		0.810644	0.0599274	0.0871		0.883145	0.0625046	0.0082		0.880559	0.0701481	0.0194
		47				0.640083	0.0447347		0.789226	0.0524925	0.142		0.890276	0.0636119	0.0101		0.910095	0.0751202	0.015
		48				0.619087	0.0416582		0.801123	0.054855	0.0474		0.885543	0.0598908	0.0027		0.893266	0.0660738	0.0043
		49				0.634464	0.0445825		0.822471	0.0567837	0.0521		0.902899	0.06239	0.0043		0.885493	0.0640804	0.0101
		50				0.630957	0.0427319		0.805839	0.0572438	0.076		0.89359	0.0658094	0.007		0.87178	0.0694628	0.0217

## Sheet: Fig 6B
Figure	Parameter measured	Statistical test	Genotype	Number of independent cultures	Number of observations	Parametric distribution 'Kolmogorov - Smirnov test'	Mean	SEM	Median	Mean ranks	Adjusted p-value (vs WT)	Adjusted p-value (vs LEOpen)
6B	Recovery of RRP (%)	one-way ANOVA; Holm Sidak's post-hoc	WT	4	36	Yes	27.27	1.653	26.11
			∆N2-9	4	36	Yes	24.85	2.01	23.27		0.4958
			∆N2-19	4	32	Yes	19.81	1.236	18.04		0.011
			∆N2-28	4	34	Yes	20.78	1.478	19.15		0.0281

## Sheet: Fig 6C
Figure	Parameter measured	Statistical test	Genotype	Number of independent cultures	Number of observations	Parametric distribution 'Kolmogorov - Smirnov test'	Mean	SEM	Median	Mean ranks	Adjusted p-value (vs WT)
6C	Charge ratio of 250 mM / 500 mM (%)	Kruskal-Wallis Dunn's post-hoc	WT	4	35	No	29.29	3.115	24.93	65.26
			∆N2-9	4	35	Yes	26.25	3.221	22.37	56.77	>0.9999
			∆N2-19	4	33	Yes	30.79	2.223	32.27	76.67	>0.9999
			∆N2-28	4	34	Yes	31.79	2.263	31.56	78	>0.9999

## Sheet: Fig 6D
Figure	Parameter measured	Statistical test	Genotype	Number of independent cultures	Number of observations	Parametric distribution 'Kolmogorov - Smirnov test'	Mean	SEM	Median	Mean ranks	Adjusted p-value (vs WT)
6D	EPSC Amplitude (norm. to [Ca2+]e 10) [Ca2+]e 0.5 mM	Kruskal-Wallis Dunn's post-hoc	WT	3	40	Yes	0.107392	0.00953237	0.0978362	95.1
			∆N2-9	3	35	Yes	0.0766163	0.00732096	0.0769663	74.83	0.2885
			∆N2-28	3	38	Yes	0.0636524	0.00685427	0.0566103	60.87	0.0039
	EPSC Amplitude (norm. to [Ca2+]e 10) [Ca2+]e 1 mM	Kruskal-Wallis Dunn's post-hoc	WT	3	41	Yes	0.37892	0.0216193	0.366273	94.24
			∆N2-9	3	36	No	0.356513	0.0211653	0.306707	85.17	>0.9999
			∆N2-28	3	38	Yes	0.300813	0.0203604	0.286999	63.29	0.0659
	EPSC Amplitude (norm. to [Ca2+]e 10) [Ca2+]e 2 mM	Kruskal-Wallis Dunn's post-hoc	WT	3	41	Yes	0.736266	0.0247016	0.712528	98.76
			∆N2-9	3	36	No	0.681831	0.0335632	0.639461	79.31	0.3469
			∆N2-28	3	38	Yes	0.614717	0.0286026	0.572232	60.68	0.001
	EPSC Amplitude (norm. to [Ca2+]e 10) [Ca2+]e 4 mM	Kruskal-Wallis Dunn's post-hoc	WT	3	41	Yes	1.01531	0.0347279	0.970427	88.73
			∆N2-9	3	36	No	1.01322	0.0445473	0.971584	86.44	>0.9999
			∆N2-28	3	37	Yes	0.890538	0.038209	0.846353	59.86	0.0259

## Sheet: Fig 6E
Figure	Parameter measured	Statistical test	Genotype	Number of independent cultures	Number of observations	Parametric distribution 'Kolmogorov - Smirnov test'	Mean	SEM	Median	Mean ranks	Adjusted p-value (vs WT)
6E	EPSC2/EPSC1 [Ca2+]e 0.5 mM	Kruskal-Wallis Dunn's post-hoc	WT	3	39	No	2.023	0.1868	1.652	44.92
			∆N2-9	3	35	No	2.222	0.1749	1.967	57.09	0.2953
			∆N2-28	3	39	No	2.455	0.2363	2.142	64.14	0.027
	EPSC2/EPSC1 [Ca2+]e 1 mM	Kruskal-Wallis Dunn's post-hoc	WT	3	41	No	1.241	0.07333	1.136	49.76
			∆N2-9	3	36	No	1.238	0.04642	1.211	56.42	>0.9999
			∆N2-28	3	37	No	1.411	0.09927	1.299	67.14	0.0612
	EPSC2/EPSC1 [Ca2+]e 2 mM	one-way ANOVA; Holm Sidak's post-hoc	WT	3	41	Yes	0.8678	0.0355	0.8321
			∆N2-9	3	36	Yes	0.8554	0.03094	0.8089		0.793
			∆N2-28	3	37	Yes	0.9586	0.03258	0.9535		0.1043
	EPSC2/EPSC1 [Ca2+]e 4 mM	one-way ANOVA; Holm Sidak's post-hoc	WT	3	41	Yes	0.6686	0.02654	0.6715
			∆N2-9	3	36	Yes	0.6515	0.02614	0.6189		0.6673
			∆N2-28	3	37	Yes	0.768	0.03132	0.7591		0.0252
	EPSC2/EPSC1 [Ca2+]e 10 mM	one-way ANOVA; Holm Sidak's post-hoc	WT	3	41	Yes	0.5453	0.02786	0.5315
			∆N2-9	3	36	Yes	0.5256	0.03138	0.5096		0.6428
			∆N2-28	3	37	Yes	0.5967	0.03111	0.5586		0.3965

## Sheet: Fig 6F
Figure	Parameter measured	Stimulus number (x-axis)	Statistical test	Number of independent cultures	Number of observations	Mean	SEM	Number of observations	Mean	SEM	Adjusted p-value (vs WT)	Number of observations	Mean	SEM	Adjusted p-value (vs WT)	Adjusted p-value (vs LEOpen)	Number of observations	Mean	SEM	Adjusted p-value (vs WT)	Adjusted p-value (vs LEOpen)	Number of observations	Mean	SEM	Adjusted p-value (vs WT)	Adjusted p-value (vs LEOpen)
					WT			LEOpen				LEOpen + ∆N2-9					LEOpen + ∆N2-19					LEOpen + ∆N2-28
6F	EPSC(X)/EPSC(1)	1	Mixed effect analysis	5	42	1	0	30	1	0		38	1	0			40	1	0			36	1	0
		2	Followed by Tukey's post-hoc			0.968967	0.0435166		0.668277	0.0292882	<0.0001		0.883557	0.0586126	0.7683	0.0149		0.804479	0.0386056	0.0456	0.0491		0.926031	0.0700422	0.9849	0.0117
		3				0.859364	0.0427852		0.522048	0.0236898	<0.0001		0.659708	0.0497677	0.0261	0.1068		0.698056	0.0411781	0.0603	0.0041		0.801322	0.0657859	0.9463	0.0022
		4				0.767791	0.0421502		0.411814	0.0235693	<0.0001		0.618159	0.0499245	0.1596	0.0041		0.602276	0.0443603	0.0621	0.0032		0.663808	0.066183	0.6768	0.0071
		5				0.783655	0.0602751		0.355119	0.0226982	<0.0001		0.542298	0.0429006	0.0141	0.0027		0.550072	0.0395622	0.0152	0.0006		0.64235	0.0627306	0.4869	0.0008
		6				0.752589	0.0541161		0.326001	0.024866	<0.0001		0.54998	0.0569492	0.0844	0.0062		0.490411	0.0377224	0.0015	0.0048		0.576596	0.0654925	0.2439	0.0072
		7				0.721501	0.058743		0.302884	0.0199786	<0.0001		0.43774	0.0369669	0.0011	0.018		0.453477	0.0372822	0.0023	0.0065		0.520418	0.0520172	0.0878	0.0028
		8				0.710033	0.0681378		0.275143	0.0203394	<0.0001		0.444705	0.0359678	0.0089	0.0012		0.408168	0.0364068	0.0021	0.0186		0.484077	0.047433	0.0607	0.0017
		9				0.677512	0.0508332		0.276127	0.0228331	<0.0001		0.422079	0.0382649	0.0013	0.0147		0.401561	0.0344391	0.0002	0.0276		0.480932	0.0543624	0.0732	0.0094
		10				0.683034	0.0562238		0.276401	0.0205119	<0.0001		0.414153	0.0411961	0.0022	0.0326		0.379558	0.0494832	0.0011	0.317		0.421797	0.0502651	0.0076	0.0729
		11				0.701964	0.0673692		0.286054	0.0197952	<0.0001		0.378111	0.0387603	0.0009	0.2287		0.363995	0.0409488	0.0006	0.4342		0.430881	0.0506614	0.0161	0.0759
		12				0.67887	0.0628556		0.25233	0.019647	<0.0001		0.346959	0.0313019	0.0001	0.091		0.34068	0.0437342	0.0003	0.3605		0.408157	0.0446302	0.0067	0.0199
		13				0.687843	0.0647194		0.259568	0.0206636	<0.0001		0.349799	0.0334261	0.0002	0.1605		0.332768	0.0343766	<0.0001	0.3689		0.385925	0.0459419	0.0027	0.1056
		14				0.692999	0.0713692		0.255635	0.0204047	<0.0001		0.328352	0.031583	0.0002	0.3109		0.311651	0.0339415	<0.0001	0.6209		0.345145	0.0382415	0.0006	0.2505
		15				0.681205	0.0639058		0.242664	0.0186318	<0.0001		0.307871	0.0285795	<0.0001	0.3225		0.306102	0.0376388	<0.0001	0.5602		0.360904	0.0439598	0.0009	0.1136
		16				0.702658	0.0771055		0.243951	0.0187135	<0.0001		0.329944	0.0372382	0.0005	0.251		0.278906	0.0300506	<0.0001	0.86		0.313726	0.0349598	0.0002	0.4076
		17				0.699462	0.0855056		0.236829	0.0169507	<0.0001		0.299603	0.033768	0.0006	0.466		0.275901	0.0279543	0.0002	0.7541		0.335361	0.0351446	0.0021	0.1012
		18				0.710653	0.0815846		0.250917	0.0219604	<0.0001		0.292372	0.0279529	0.0001	0.7704		0.289718	0.032315	0.0001	0.8575		0.309247	0.0301015	0.0002	0.5249
		19				0.66793	0.0683644		0.239051	0.0174013	<0.0001		0.342984	0.0417884	0.0012	0.1636		0.251467	0.025232	<0.0001	0.9942		0.335033	0.0394525	0.0007	0.1879
		20				0.692881	0.085934		0.243326	0.0198759	<0.0001		0.261564	0.0254987	0.0001	0.9798		0.233762	0.0212926	<0.0001	0.9974		0.295398	0.0290502	0.0006	0.5797
		21				0.677653	0.0723969		0.239376	0.0164513	<0.0001		0.27259	0.0296815	<0.0001	0.8637		0.253597	0.0232096	<0.0001	0.9871		0.305645	0.0315617	0.0002	0.3504
		22				0.645897	0.0727102		0.235937	0.019224	<0.0001		0.273234	0.02813	0.0001	0.8086		0.24379	0.0234934	<0.0001	0.999		0.301364	0.0329484	0.0006	0.4333
		23				0.640334	0.0629857		0.2474	0.0175654	<0.0001		0.2758	0.0287304	<0.0001	0.9159		0.235444	0.0232116	<0.0001	0.9939		0.311882	0.0347447	0.0002	0.4695
		24				0.666225	0.0879865		0.231328	0.0167455	0.0001		0.252119	0.0274151	0.0004	0.9665		0.238786	0.0196622	0.0002	0.9984		0.283763	0.0313239	0.0014	0.5821
		25				0.653169	0.0689985		0.242491	0.016855	<0.0001		0.258328	0.0274193	<0.0001	0.9878		0.211885	0.0182379	<0.0001	0.7326		0.291018	0.0288396	0.0001	0.5969
		26				0.659267	0.080715		0.244227	0.0143938	<0.0001		0.275091	0.0309524	0.0004	0.894		0.239252	0.019851	<0.0001	0.9996		0.266436	0.0267873	0.0003	0.9485
		27				0.681554	0.0889786		0.239148	0.0181957	<0.0001		0.258282	0.0264342	0.0003	0.9752		0.227206	0.0257296	0.0001	0.9955		0.269557	0.0220028	0.0004	0.8236
		28				0.653524	0.082671		0.23937	0.0191125	<0.0001		0.247724	0.0236387	0.0002	0.9987		0.230466	0.021749	<0.0001	0.998		0.275069	0.0248177	0.0006	0.7849
		29				0.686024	0.0818933		0.229121	0.01345	<0.0001		0.237138	0.0244386	<0.0001	0.9985		0.219076	0.0203373	<0.0001	0.9938		0.28579	0.0321634	0.0003	0.4891
		30				0.625402	0.0707142		0.239542	0.0168064	<0.0001		0.26259	0.0274483	0.0001	0.952		0.219969	0.0196983	<0.0001	0.9422		0.264762	0.025054	0.0001	0.9183
		31				0.655867	0.0858936		0.230469	0.015538	0.0001		0.266514	0.0254501	0.0007	0.7463		0.213431	0.0168523	<0.0001	0.9454		0.26914	0.0220812	0.0007	0.6096
		32				0.666615	0.0894818		0.235432	0.0155573	0.0002		0.240129	0.0245229	0.0003	0.9998		0.225241	0.02031	0.0002	0.9946		0.252161	0.0186714	0.0004	0.9583
		33				0.660802	0.0841333		0.246044	0.0151287	0.0001		0.250032	0.0294307	0.0003	>0.9999		0.228647	0.023854	<0.0001	0.972		0.270964	0.0260168	0.0005	0.9208
		34				0.702554	0.106023		0.238429	0.0130256	0.0008		0.224962	0.0251559	0.0006	0.9893		0.237293	0.0252072	0.0009	>0.9999		0.256751	0.0241787	0.0015	0.9626
		35				0.649258	0.0819318		0.231657	0.0154046	<0.0001		0.23239	0.0266487	0.0001	>0.9999		0.217678	0.0213752	<0.0001	0.9839		0.258608	0.0210335	0.0003	0.8387
		36				0.669207	0.0931399		0.237053	0.0178649	0.0004		0.238868	0.0279475	0.0005	>0.9999		0.223724	0.0200975	0.0003	0.9875		0.262929	0.0208394	0.0009	0.8791
		37				0.63818	0.0835311		0.241495	0.015455	0.0003		0.24823	0.0274516	0.0005	0.9995		0.22493	0.0204656	0.0002	0.9668		0.267213	0.0212485	0.0008	0.8637
		38				0.683692	0.0951723		0.234258	0.0206568	0.0003		0.22082	0.0272754	0.0002	0.9948		0.214769	0.0200324	0.0002	0.9607		0.279619	0.0258832	0.0015	0.649
		39				0.67148	0.102888		0.241784	0.0145994	0.0015		0.257182	0.0283554	0.0028	0.9886		0.207404	0.017126	0.0005	0.5484		0.252624	0.0212837	0.0022	0.9933
		40				0.617699	0.0806695		0.236893	0.0157813	0.0003		0.249209	0.0232996	0.0006	0.9922		0.206736	0.0171976	<0.0001	0.697		0.279724	0.0281908	0.0021	0.6766
		41				0.632774	0.0789855		0.234182	0.0150536	0.0001		0.237042	0.0285258	0.0002	>0.9999		0.224505	0.0190901	<0.0001	0.9946		0.273057	0.0257927	0.0007	0.6913
		42				0.6347	0.0799817		0.243706	0.0169053	0.0002		0.226535	0.0216672	0.0001	0.9706		0.213522	0.0224581	<0.0001	0.8193		0.250178	0.0191791	0.0002	0.9991
		43				0.659277	0.0941201		0.234583	0.0149038	0.0005		0.245878	0.0285356	0.001	0.9967		0.215683	0.0180412	0.0003	0.9274		0.267934	0.0253961	0.0019	0.7886
		44				0.659372	0.115231		0.216609	0.0167679	0.0039		0.235583	0.0247865	0.0068	0.9689		0.220461	0.0202418	0.0045	0.9999		0.235551	0.0183151	0.0063	0.9403
		45				0.626269	0.0881763		0.250237	0.0156637	0.0012		0.250884	0.0257825	0.0015	>0.9999		0.224294	0.0250165	0.0006	0.9036		0.262936	0.0222551	0.0021	0.99
		46				0.637072	0.0939206		0.237202	0.015439	0.0012		0.231853	0.0247439	0.0012	0.9997		0.220083	0.0257293	0.0008	0.9789		0.234451	0.017473	0.0011	>0.9999
		47				0.647441	0.0952561		0.234509	0.0172674	0.001		0.219254	0.0263628	0.0007	0.9886		0.208807	0.0186884	0.0004	0.8499		0.261243	0.0215572	0.0024	0.8685
		48				0.606048	0.0833262		0.23164	0.0172175	0.0006		0.221822	0.0250987	0.0005	0.9976		0.212291	0.0162286	0.0003	0.9242		0.245214	0.0216488	0.0011	0.988
		49				0.650034	0.0937768		0.227991	0.0159667	0.0006		0.238593	0.0277904	0.001	0.9973		0.227571	0.0206876	0.0006	>0.9999		0.252142	0.0187143	0.0013	0.8625
		50				0.616005	0.0897233		0.223021	0.0150533	0.0008		0.228808	0.0247302	0.0012	0.9996		0.226118	0.0209356	0.001	>0.9999		0.240254	0.0179574	0.0015	0.9474

## Sheet: Fig 6G
Figure	Parameter measured	Statistical test	Genotype	Number of independent cultures	Number of observations	Parametric distribution 'Kolmogorov - Smirnov test'	Mean	SEM	Median	Mean ranks	Adjusted p-value (vs WT)	Adjusted p-value (vs LEOpen)
6G	Recovery of RRP (%)	Kruskal-Wallis Dunn's post-hoc	WT	4	34	No	22.02	1.82	21.84	58.32		<0.0001
			LEOpen	4	28	Yes	57.92	3.328	56.04	131	<0.0001
			LEOpen + ∆N2-9	4	30	No	26.66	2.567	22.59	70.37	>0.9999	<0.0001
			LEOpen + ∆N2-19	4	32	No	27.13	3.005	21.55	68.44	>0.9999	<0.0001
			LEOpen + ∆N2-28	4	30	Yes	25.04	2.457	23.06	66.07	>0.9999	<0.0001

## Sheet: Fig 6H
Figure	Parameter measured	Statistical test	Genotype	Number of independent cultures	Number of observations	Parametric distribution 'Kolmogorov - Smirnov test'	Mean	SEM	Median	Mean ranks	Adjusted p-value (vs WT)	Adjusted p-value (vs LEOpen)
6H	Charge ratio of 250 mM / 500 mM (%)	Kruskal-Wallis Dunn's post-hoc	WT	4	33	Yes	26	2.585	24.26	47.97		0.0005
			LEOpen	4	30	No	45.48	3.485	39.69	95.28	0.0005
			LEOpen + ∆N2-9	4	33	Yes	41.68	2.8	40.17	88.36	0.004	>0.9999
			LEOpen + ∆N2-19	4	33	Yes	44.34	3.475	39.23	91.53	0.0013	>0.9999
			LEOpen + ∆N2-28	4	31	Yes	39.83	3.834	38.14	80.71	0.0473	>0.9999

## Sheet: Fig 6I
Figure	Parameter measured	Statistical test	Genotype	Number of independent cultures	Number of observations	Parametric distribution 'Kolmogorov - Smirnov test'	Mean	SEM	Median	Mean ranks	Adjusted p-value (vs WT)	Adjusted p-value (vs LEOpen)
6I	EPSC Amplitude (norm. to [Ca2+]e 10) [Ca2+]e 0.5 mM	one-way ANOVA; Holm Sidak's post-hoc	WT	2	23	Yes	0.1064	0.01473	0.09271			<0.0001
			LEOpen	2	23	Yes	0.2864	0.02868	0.2887		<0.0001
			LEOpen + ∆N2-9	2	21	Yes	0.1474	0.02342	0.1522		0.4174	0.0006
			LEOpen + ∆N2-28	2	23	Yes	0.1619	0.02666	0.1499		0.2764	0.0015
	EPSC Amplitude (norm. to [Ca2+]e 10) [Ca2+]e 1 mM	one-way ANOVA; Holm Sidak's post-hoc	WT	2	23	Yes	0.313	0.02792	0.2957			<0.0001
			LEOpen	2	23	Yes	0.6118	0.04149	0.6016		<0.0001
			LEOpen + ∆N2-9	2	21	Yes	0.4403	0.03898	0.4258		0.0467	0.0053
			LEOpen + ∆N2-28	2	23	Yes	0.4188	0.03497	0.4067		0.0769	0.0012
	EPSC Amplitude (norm. to [Ca2+]e 10) [Ca2+]e 2 mM	one-way ANOVA; Holm Sidak's post-hoc	WT	2	23	Yes	0.6954	0.03664	0.7117			0.0012
			LEOpen	2	23	Yes	0.9355	0.04643	1.012		0.0012
			LEOpen + ∆N2-9	2	21	Yes	0.8345	0.05013	0.872		0.1209	0.2982
			LEOpen + ∆N2-28	2	23	Yes	0.7949	0.04347	0.8175		0.2982	0.1209
	EPSC Amplitude (norm. to [Ca2+]e 10) [Ca2+]e 4 mM	one-way ANOVA; Holm Sidak's post-hoc	WT	2	23	Yes	0.9786	0.04892	0.9857			0.8375
			LEOpen	2	23	Yes	1.046	0.03793	1.051		0.8375
			LEOpen + ∆N2-9	2	21	Yes	1.014	0.05499	0.9541		0.95	0.95
			LEOpen + ∆N2-28	2	23	Yes	0.9719	0.04455	0.9458		0.95	0.8346

## Sheet: Fig 6J
Figure	Parameter measured	Statistical test	Genotype	Number of independent cultures	Number of observations	Parametric distribution 'Kolmogorov - Smirnov test'	Mean	SEM	Median	Mean ranks	Adjusted p-value (vs WT)	Adjusted p-value (vs LEOpen)
6J	EPSC2/EPSC1 [Ca2+]e 0.5 mM	Kruskal-Wallis Dunn's post-hoc	WT	2	23	No	2.073	0.226	1.867	56.22		<0.0001
			LEOpen	2	23	Yes	1.136	0.09696	0.9865	21.7	<0.0001
			LEOpen + ∆N2-9	2	17	Yes	1.86	0.1864	1.754	49.53	>0.9999	0.0013
			LEOpen + ∆N2-28	2	19	No	1.613	0.1674	1.414	43.47	0.5453	0.0248
	EPSC2/EPSC1 [Ca2+]e 1 mM	Kruskal-Wallis Dunn's post-hoc	WT	2	23	Yes	1.225	0.05792	1.21	60.04		<0.0001
			LEOpen	2	23	Yes	0.7197	0.03971	0.7435	20.26	<0.0001
			LEOpen + ∆N2-9	2	20	Yes	1.191	0.09294	1.175	53.6	>0.9999	0.0001
			LEOpen + ∆N2-28	2	23	No	1.141	0.113	0.9629	47.22	0.5537	0.0024
	EPSC2/EPSC1 [Ca2+]e 2 mM	Kruskal-Wallis Dunn's post-hoc	WT	2	23	Yes	0.8603	0.03791	0.8763	64.52		<0.0001
			LEOpen	2	23	Yes	0.5285	0.0314	0.5286	24.04	<0.0001
			LEOpen + ∆N2-9	2	20	Yes	0.7517	0.04443	0.703	50.4	0.4429	0.0051
			LEOpen + ∆N2-28	2	23	No	0.7079	0.07619	0.699	41.74	0.0167	0.1212
	EPSC2/EPSC1 [Ca2+]e 4 mM	one-way ANOVA; Holm Sidak's post-hoc	WT	2	23	Yes	0.6825	0.03186	0.6845			<0.0001
			LEOpen	2	23	Yes	0.4262	0.02762	0.4419		<0.0001
			LEOpen + ∆N2-9	2	20	Yes	0.5611	0.03374	0.5359		0.0427	0.0268
			LEOpen + ∆N2-28	2	23	Yes	0.5147	0.04019	0.4949		0.0029	0.1208
	EPSC2/EPSC1 [Ca2+]e 10 mM	Kruskal-Wallis Dunn's post-hoc	WT	2	23	No	0.5511	0.02466	0.6008	64.57		<0.0001
			LEOpen	2	23	Yes	0.3396	0.02699	0.3166	30.74	<0.0001
			LEOpen + ∆N2-9	2	20	Yes	0.4525	0.03725	0.4134	46.75	0.1447	0.256
			LEOpen + ∆N2-28	2	23	Yes	0.3954	0.03711	0.3606	38.17	0.0032	>0.9999
