# Supplementary material for: Reexamination of N-terminal domains of syntaxin-1 in vesicle fusion from central murine synapses
Source: eLife. 2021 Aug 24;10:e69498. doi: 10.7554/eLife.69498 (PMC8416022; doi:10.7554/eLife.69498)
Supplement: Figure 7—figure supplement 1—source data 1. [file elife-69498-fig7-figsupp1-data1.xlsx]

## Sheet: Figure 1-supplement 1
Figure	Parameter measured	Statistical test	Genotype	Number of independent cultures	Number of observations	Parametric distribution 'Kolmogorov - Smirnov test'	Mean	SEM	Median	Mean ranks	Adjusted p-value (vs WT)	Adjusted p-value (vs STX1-null)
Figure 1-supplement 1A	STX1A/Bassoon (%; norm. to WT)	Kruskal-Wallis Dunn's post-hoc	STX1-null	2	30	No	13.04	1.585	15.93	11.02	<0.0001
			WT	2	30	No	100	7.513	54.73	83.45		<0.0001
			WT-FLAG	2	30	Yes	131	10.16	65.83	125.5	0.2996	<0.0001
Figure 1-supplement 1B	FLAG/Bassoon (%; norm. to WT-FLAG)	Kruskal-Wallis Dunn's post-hoc	WT	2	30	Yes	10.64	0.5158	10.27	31.07	<0.0001
			WT-FLAG	2	30	Yes	100	9.608	88.65	123.1
			∆N2-9-FLAG	2	30	No	30.37	2.802	25.82	78.73	<0.0001
			LEOpen-FLAG	2	30	Yes	78.59	8.511	61.8	113	0.0002
			∆Habc-FLAG	2	30	Yes	10.7	0.4837	10.27	31.6	>0.9999
Figure	Parameter measured	Statistical test	Genotype	Number of independent cultures	Number of observations	Parametric distribution 'Kolmogorov - Smirnov test'	Mean	SEM	Median	Mean ranks	Adjusted p-value (vs WT 1 X)	Adjusted p-value (vs LEOpen 1 X)
EV 2C	NLS-GFP fluoresence (norm. to WT 1 X rescue (%))	Kruskal-Wallis Dunn's post-hoc	LEOpen + ∆2-28 1 X	2	20	Yes	116.4	9.644	118.5	92.35	>0.9999	>0.9999
			WT 1 X	2	20	No	100	7.445	97.69	83.7		>0.9999
			WT 1/12 X	2	20	Yes	23.97	4.026	16.65	23.7	<0.0001	<0.0001
			LEOpen 1 X	2	20	Yes	97.91	9.237	104.6	81.8	>0.9999
			LEOpen 1/3 X	2	20	Yes	45.6	8.796	31.43	42.7	0.0029	<0.0001
			LEOpen 1/6 X	2	20	No	35.62	3.981	32.78	38.75	0.0007	<0.0001
EV 2D	STX1A / VGlut1 (norm. to WT 1 X rescue (%))	Kruskal-Wallis Dunn's post-hoc	LEOpen + ∆2-28 1 X	3	25	No	14.25	2.628	8.663	58.04	<0.0001	0.0222
			WT 1 X	3	25	Yes	100	11.13	80.21	131.6		0.0661
			WT 1/12 X	3	24	No	17.12	3.568	9.526	64.54	<0.0001	0.1323
			LEOpen 1 X	3	25	No	36.66	6.861	27.72	96.84	0.0661
			LEOpen 1/3 X	3	25	No	13.43	3.42	7.68	56.24	<0.0001	0.0132
			LEOpen 1/6 X	3	25	Yes	7.221	0.9206	5.979	42.32	<0.0001	0.0001
EV 2E	Munc18-1 / VGlut1 (norm. to WT 1 X rescue (%))	Kruskal-Wallis Dunn's post-hoc	LEOpen + ∆2-28 1 X	3	25	Yes	38.05	3.428	33.79	58.84	<0.0001	0.5617
			WT 1 X	3	25	Yes	100	8.53	95.67	125.3
			WT 1/12 X	3	24	No	51.87	4.944	46.31	85.79	0.0203	>0.9999
			LEOpen 1 X	3	25	Yes	49.68	4.217	44.73	84.24	0.0115
			LEOpen 1/3 X	3	25	Yes	31.78	2.563	27.93	44.04	<0.0001	0.0149
			LEOpen 1/6 X	3	25	Yes	33.4	2.07	32.33	52.2	<0.0001	0.13
EV 2F	EPSC Amplitude (nA)	Kruskal-Wallis Dunn's post-hoc	LEOpen + ∆2-28 1 X	2	26	Yes	1.881	0.3298	1.372	46.31	0.069	0.0051
			WT 1 X	2	25	Yes	4.764	0.8706	3.904	86.6		>0.9999
			WT 1/12 X	2	28	Yes	4.381	0.6894	3.164	84.64	>0.9999	>0.9999
			LEOpen 1 X	2	28	No	4.967	0.6699	4.294	95.21	>0.9999
			LEOpen 1/3 X	2	28	Yes	5.508	0.8519	4.135	96.36	>0.9999	>0.9999
			LEOpen 1/6 X	2	26	Yes	4.44	0.6028	4.662	90.31	>0.9999	>0.9999
EV 2G	RRP Total Charge (nC)	Kruskal-Wallis Dunn's post-hoc	LEOpen + ∆2-28 1 X	2	22	No	0.09649	0.01716	0.06153	45.05	0.001	>0.9999
			WT 1 X	2	24	No	0.3806	0.08381	0.2417	94.21		0.1214
			WT 1/12 X	2	24	Yes	0.2948	0.05095	0.2201	89.63	>0.9999	0.3539
			LEOpen 1 X	2	25	No	0.1554	0.02974	0.1088	62.64	0.1214
			LEOpen 1/3 X	2	26	No	0.1698	0.0236	0.1365	73.46	>0.9999	>0.9999
			LEOpen 1/6 X	2	23	Yes	0.1434	0.01809	0.1281	67.87	0.4571	>0.9999
EV 2H	Pvr (%)	Kruskal-Wallis Dunn's post-hoc	LEOpen + ∆2-28 1 X	2	22	No	9.831	1.545	7.598	57.14	>0.9999	0.0352
			WT 1 X	2	23	Yes	9.612	1.109	8.94	58.52		0.0459
			WT 1/12 X	2	24	No	11.11	1.902	8.016	59.92	>0.9999	0.0605
			LEOpen 1 X	2	25	Yes	19.94	2.775	16.2	93.72	0.0459
			LEOpen 1/3 X	2	25	No	15.32	2.978	10.47	70.28	>0.9999	0.6592
			LEOpen 1/6 X	2	23	Yes	15.09	1.417	14.66	87.48	0.2547	>0.9999
EV 2I	mEPSC frequency (Hz)	Kruskal-Wallis Dunn's post-hoc	LEOpen + ∆2-28 1 X	2	24	No	4.267	1.361	1.501	46.67	>0.9999	<0.0001
			WT 1 X	2	23	Yes	6.152	1.13	4.125	64.37		0.0038
			WT 1/12 X	2	24	No	4.04	1.051	2.54	49.96	>0.9999	<0.0001
			LEOpen 1 X	2	28	Yes	15.82	1.557	17	109.4	0.0038
			LEOpen 1/3 X	2	27	Yes	11.44	1.429	11.29	91.2	0.4574	>0.9999
			LEOpen 1/6 X	2	25	Yes	10.87	1.785	10.79	86.02	>0.9999	0.77+A10:M5268
Figure	Parameter measured	Statistical test	Genotype	Number of independent cultures	Number of observations	Parametric distribution 'Kolmogorov - Smirnov test'	Mean	SEM	Median	Mean ranks	Adjusted p-value (vs WT)	Adjusted p-value (vs STX1-null)
S1B	Neuronal density (DIV 8; #/mm2)	Kruskal-Wallis Dunn's post-hoc	STX1-null	3	90	No	36.83	2.573	31.3	263.8	>0.9999
			WT	3	90	No	34.56	2.338	30.89	253.6		>0.9999
			LEOpen	3	90	No	36.81	2.564	34.55	280.6	>0.9999	>0.9999
			LEOpen + ∆N2-9	3	90	No	31.53	1.37	32.52	257.9	>0.9999	>0.9999
			LEOpen + ∆N2-19	3	90	Yes	35.65	2.066	32.93	276.1	>0.9999	>0.9999
			LEOpen + ∆N2-28	3	90	No	38.15	2.304	34.15	291	>0.9999	>0.9999
S1C	Cell Number (DIV 15 / DIV 8; %)	Kruskal-Wallis Dunn's post-hoc	STX1-null	3	90	No	30.08	2.889	24.69	93.7	<0.0001
			WT	3	90	No	130.3	13.38	97.4	315.6		<0.0001
			LEOpen	3	90	No	121.9	8.953	116.5	337.4	>0.9999	<0.0001
			LEOpen + ∆N2-9	3	90	Yes	97.13	5.824	89.19	289.8	>0.9999	<0.0001
			LEOpen + ∆N2-19	3	90	No	95.21	5.077	89.63	290.8	>0.9999	<0.0001
			LEOpen + ∆N2-28	3	90	No	106.7	7.263	90.4	295.7	>0.9999	<0.0001
	Cell Number (DIV 22 / DIV 8; %)	Kruskal-Wallis Dunn's post-hoc	STX1-null	3	90	No	9.313	1.904	1.466	73.2	<0.0001
			WT	3	90	No	105.7	7.225	87.55	357.6		<0.0001
			LEOpen	3	90	No	105.7	9.324	93.23	352.6	>0.9999	<0.0001
			LEOpen + ∆N2-9	3	90	No	69.95	4.457	63.73	282	0.0172	<0.0001
			LEOpen + ∆N2-19	3	90	Yes	64.03	4.77	56.25	262.1	0.0006	<0.0001
			LEOpen + ∆N2-28	3	90	No	78.33	5.802	67.8	295.5	0.113	<0.0001
	Cell Number (DIV 29 / DIV 8; %)	Kruskal-Wallis Dunn's post-hoc	STX1-null	3	84	No	3.56	0.923	0	73.51	<0.0001
			WT	3	90	No	97.2	6.789	87.44	400.8		<0.0001
			LEOpen	3	90	No	83.22	7.474	70.09	365.6	>0.9999	<0.0001
			LEOpen + ∆N2-9	3	90	No	39.38	3.16	34.58	261.1	<0.0001	<0.0001
			LEOpen + ∆N2-19	3	90	No	35.42	3.702	27.68	235.6	<0.0001	<0.0001
			LEOpen + ∆N2-28	3	90	No	39.8	3.834	30.95	255.4	<0.0001	<0.0001
	Cell Number (DIV 36 / DIV 8; %)	Kruskal-Wallis Dunn's post-hoc	STX1-null	3	90	No	0	0	0	70	<0.0001
			WT	3	90	No	98.3	6.567	78.5	439.6		<0.0001
			LEOpen	3	90	No	77.26	7.16	56.24	387.1	0.341	<0.0001
			LEOpen + ∆N2-9	3	90	No	26.43	3.519	15.06	259.4	<0.0001	<0.0001
			LEOpen + ∆N2-19	3	90	No	18.17	2.706	9.985	221.3	<0.0001	<0.0001
			LEOpen + ∆N2-28	3	90	No	22.31	2.849	9.135	245.6	<0.0001	<0.0001
	Cell Number (DIV 43 / DIV 8; %)	Kruskal-Wallis Dunn's post-hoc	STX1-null	3	84	No	0	0	0	93	<0.0001
			WT	3	90	No	82.18	6.911	68.9	448.5		<0.0001
			LEOpen	3	90	No	51.24	4.846	44.4	390.9	0.1724	<0.0001
			LEOpen + ∆N2-9	3	90	No	11.38	1.746	5.137	244.6	<0.0001	<0.0001
			LEOpen + ∆N2-19	3	90	No	5.745	0.8124	2.768	205.6	<0.0001	<0.0001
			LEOpen + ∆N2-28	3	90	No	10.17	1.432	5.481	240.3	<0.0001	<0.0001
Figure	Parameter measured	Statistical test	Genotype	Number of independent cultures	Number of observations	Parametric distribution 'Kolmogorov - Smirnov test'	Mean	SEM	Median	Mean ranks	Adjusted p-value (vs WT)	Adjusted p-value (vs LEOpen)
EV 4A	EPSC Amplitude (norm. to [Ca2+]e 10) [Ca2+]e 0.5 mM	Kruskal-Wallis Dunn's post-hoc	WT	3	40	Yes	0.107392	0.00953237	0.0978362	95.1
		with the data in Fig 6A	∆N2-19	3	40	No	0.0894	0.01195	0.07047	76.13	0.3329
	EPSC Amplitude (norm. to [Ca2+]e 10) [Ca2+]e 1 mM	Kruskal-Wallis Dunn's post-hoc	WT	3	41	Yes	0.37892	0.0216193	0.366273	94.24
		with the data in Fig 6A	∆N2-19	3	40	Yes	0.3129	0.02164	0.2897	68.88	0.0659
	EPSC Amplitude (norm. to [Ca2+]e 10) [Ca2+]e 2 mM	Kruskal-Wallis Dunn's post-hoc	WT	3	41	Yes	0.736266	0.0247016	0.712528	98.76
		with the data in Fig 6A	∆N2-19	3	40	Yes	0.6407	0.02741	0.6289	72	0.0439
	EPSC Amplitude (norm. to [Ca2+]e 10) [Ca2+]e 4 mM	Kruskal-Wallis Dunn's post-hoc	WT	3	41	Yes	1.01531	0.0347279	0.970427	88.73
		with the data in Fig 6A	∆N2-19	3	40	Yes	0.95	0.03441	0.9117	74.25	0.864
EV 4B	EPSC2/EPSC1 [Ca2+]e 0.5 mM	two-way ANOVA (of the means of the responses)	WT	3	39		2.104
			∆N2-9	3	34		2.391				0.1716
			∆N2-28	3	34		2.531				0.0099
	EPSC2/EPSC1 [Ca2+]e 2 mM	two-way ANOVA (of the means of the responses)	WT	3	41		0.732
			∆N2-9	3	36		0.75				0.7632
			∆N2-28	3	38		0.8234				0.0009
	EPSC2/EPSC1 [Ca2+]e 10 mM	two-way ANOVA (of the means of the responses)	WT	3	41		0.4988
			∆N2-9	3	36		0.4804				0.8293
			∆N2-28	3	38		0.5203				0.7562
EV 4C	EPSC Amplitude (norm. to [Ca2+]e 10) [Ca2+]e 0.5 mM	one-way ANOVA; Holm Sidak's post-hoc	WT	2	23	Yes	0.1064	0.01473	0.09271			<0.0001
		with the data in Fig 6I	LEOpen	2	23	Yes	0.2864	0.02868	0.2887		<0.0001
			LEOpen + ∆2-19	2	22	Yes	0.1474	0.0186	0.1494		0.6949	0.0004
	EPSC Amplitude (norm. to [Ca2+]e 10) [Ca2+]e 1 mM	one-way ANOVA; Holm Sidak's post-hoc	WT	2	23	Yes	0.313	0.02792	0.2957			<0.0001
		with the data in Fig 6I	LEOpen	2	23	Yes	0.6118	0.04149	0.6016		<0.0001
			LEOpen + ∆2-19	2	22	Yes	0.4248	0.02991	0.4071		0.1221	0.002
	EPSC Amplitude (norm. to [Ca2+]e 10) [Ca2+]e 2 mM	one-way ANOVA; Holm Sidak's post-hoc	WT	2	23	Yes	0.6954	0.03664	0.7117			0.0012
		with the data in Fig 6I	LEOpen	2	23	Yes	0.9355	0.04643	1.012		0.0012
			LEOpen + ∆2-19	2	22	Yes	0.792	0.04503	0.8047		0.5067	0.1955
	EPSC Amplitude (norm. to [Ca2+]e 10) [Ca2+]e 4 mM	one-way ANOVA; Holm Sidak's post-hoc	WT	2	23	Yes	0.9786	0.04892	0.9857			0.8375
		with the data in Fig 6I	LEOpen	2	23	Yes	1.046	0.03793	1.051		0.8375
			LEOpen + ∆2-19	2	22	Yes	0.9776	0.04552	0.9982		0.9994	0.959
EV 4D	EPSC2/EPSC1 [Ca2+]e 0.5 mM	two-way ANOVA (of the means of the responses)	WT	2	22		1.976					<0.0001
			LEOpen	2	23		1.047				<0.0001
			LEOpen + ∆2-9	2	19		1.91				0.9685	<0.0001
			LEOpen + ∆2-28	2	19		1.669				0.2925	0.0005
	EPSC2/EPSC1 [Ca2+]e 2 mM	two-way ANOVA (of the means of the responses)	WT	2	23		0.7455					<0.0001
			LEOpen	2	23		0.4651				<0.0001
			LEOpen + ∆2-9	2	22		0.6049				0.0006	0.0031
			LEOpen + ∆2-28	2	23		0.5682				0.0001	0.1027
	EPSC2/EPSC1 [Ca2+]e 10 mM	two-way ANOVA (of the means of the responses)	WT	2	23		0.4959					0.0072
			LEOpen	2	23		0.3606				0.0072
			LEOpen + ∆2-9	2	22		0.4143				0.1994	0.6244
			LEOpen + ∆2-28	2	23		0.3958				0.0765	0.8604
Figure	Parameter measured	Statistical test	Genotype	Number of independent cultures	Number of observations	Parametric distribution 'Kolmogorov - Smirnov test'	Mean	SEM	Median	Mean ranks	Adjusted p-value (vs WT)	Adjusted p-value (vs STX1-null)
Appendix S2B	STX1A/Bassoon (%; norm. to WT)	Kruskal-Wallis Dunn's post-hoc	STX1-null	3	39	No	5.076	1.044	4.538	20.1	<0.0001
			WT	3	50	No	100	6.716	85.24	120.8		<0.0001
			S14A	3	50	No	87.15	4.132	79.08	112.4	<0.0001	<0.0001
			S14E	3	48	Yes	83.79	4.638	79.93	107	<0.0001	<0.0001
Appendix S2C	Munc18-1/Bassoon (%; norm. to WT)	Kruskal-Wallis Dunn's post-hoc	STX1-null	3	39	No	28.05	1.881	26.1	23.31	<0.0001
			WT	3	50	Yes	100	6.78	90.43	115.9		<0.0001
			S14A	3	50	Yes	92.27	5.562	86.86	110.5	<0.0001	<0.0001
			S14E	3	48	No	99.45	7.851	87.16	111.4	<0.0001	<0.0001
Appendix S2D	EPSC Amplitude (nA)	Kruskal-Wallis Dunn's post-hoc	STX1-null	5	36	No	0.03339	0.0184	0	20.22	<0.0001
			WT	6	65	No	3.912	0.4256	3.015	122.3		<0.0001
			S14A	6	57	No	4.54	0.5278	3.07	129.4	>0.9999	<0.0001
			S14E	6	62	No	4.548	0.4245	3.97	133.1	>0.9999	<0.0001
Appendix S2E	RRP Total Charge (nC)	Kruskal-Wallis Dunn's post-hoc	STX1-null	3	20	No	0.008978	0.004177	0.0003699	12.28	<0.0001
			WT	6	58	No	0.3782	0.03536	0.3161	103.6		<0.0001
			S14A	6	55	No	0.4377	0.0496	0.3358	110.1	>0.9999	<0.0001
			S14E	6	58	No	0.4025	0.04305	0.3317	103.9	>0.9999	<0.0001
Appendix S2F	Pvr (%)	Kruskal-Wallis Dunn's post-hoc	WT	6	57	Yes	5.557	0.5457	4.844	77.77
			S14A	6	55	No	6.017	0.5641	5.096	83.62	>0.9999
			S14E	6	57	No	7.026	0.6595	6.405	93.56	0.2548
Appendix S2G	EPSC2/EPSC1	Kruskal-Wallis Dunn's post-hoc	WT	4	37		1.201	0.07304	1.094	47.27
			S14A	4	34		1.28	0.05807	1.305	60.29	0.2237
			S14E	4	35		1.211	0.05292	1.162	53.49	>0.9999
Appendix S2H	mEPSC frequency (Hz)	Kruskal-Wallis Dunn's post-hoc	STX1-null	3	12	No	0.14	0.1226	0	18.67	0.0001
			WT	6	55	No	5.206	0.7788	2.83	87.53		0.0001
			S14A	6	50	No	5.877	0.929	3.633	90.99	>0.9999	<0.0001
			S14E	6	60	No	6.833	0.8124	5.75	102.8	0.6648	<0.0001
Appendix S2I	EPSC(X)/EPSC(1)	Kruskal-Wallis Dunn's post-hoc	WT	4	34		7.843	0.5928	7.07	50.03
		Sum of stimuli 2-10	S14A	4	35		7.328	0.3896	7.149	49.7	>0.9999
			S14E	4	30		7.625	0.4076	7.118	52.48	>0.9999
		Kruskal-Wallis Dunn's post-hoc	WT	4	35		7.045	0.9135	5.431	47.04
		Sum of last 10 stimuli	S14A	4	35		6.588	0.4505	5.97	50.19	>0.9999
			S14E	4	30		6.553	0.3888	6.212	53.13	>0.9999
Figure	Parameter measured	Statistical test	Genotype	Number of independent cultures	Number of observations	Parametric distribution 'Kolmogorov - Smirnov test'	Mean	SEM	Median	Mean ranks	Adjusted p-value (vs WT)	Adjusted p-value (vs STX1-null)
Appendix S3B	Neuronal density (DIV 8; #/mm2)	Kruskal-Wallis Dunn's post-hoc	STX1-null	4	120	No	31.13	1.844	26.02	330.2	0.0608
			WT	4	120	No	41.78	2.683	32.93	420.1		0.0608
			∆N2-9	4	90	No	38.94	3.4	28.46	381.6	>0.9999	>0.9999
			∆N2-19	4	120	No	43.67	2.454	37.4	452.3	>0.9999	0.0011
			∆N2-28	4	120	No	41.81	2.141	36.18	457	>0.9999	0.0006
			S14A	4	120	No	42.41	2.611	33.33	436.3	>0.9999	0.0093
			S14E	4	120	No	36.57	2.739	26.83	355.1	0.6575	>0.9999
Appendix S3C	Cell Number (DIV 29 / DIV 8)	Kruskal-Wallis Dunn's post-hoc	STX1-null	4	120	No	1.27	0.2438	0	70.81	<0.0001
			WT	4	120	No	93.16	6.006	80.55	445.5		<0.0001
			∆N2-9	4	90	No	104	8.697	80.62	459.3	>0.9999	<0.0001
			∆N2-19	4	120	No	101.9	6.099	80.9	479.8	>0.9999	<0.0001
			∆N2-28	4	120	No	94.18	5.658	84.73	461.3	>0.9999	<0.0001
			S14A	4	120	No	109	8.381	86.18	471.6	>0.9999	<0.0001
			S14E	4	105	No	95.4	8.866	62.02	415.3	>0.9999	<0.0001
Figure	Parameter measured	Statistical test	Genotype	Number of independent cultures	Number of observations	Parametric distribution 'Kolmogorov - Smirnov test'	Mean	SEM	Median	Mean ranks	Adjusted p-value (vs WT 1X)
S8	∆F/F0 AP # 1	Mann-Whitney	WT 1X	2	25	No	0.1027	0.03867	0.02723	21.8
			WT 1/12X	2	19	No	0.1001	0.02893	0.04004	23.42	0.6901
	∆F/F0 AP # 2	Mann-Whitney	WT 1X	2	25	No	0.1848	0.03905	0.09956	20.4
			WT 1/12X	2	19	No	0.2834	0.08666	0.1586	25.26	0.2204
	∆F/F0 AP # 5	Mann-Whitney	WT 1X	2	25	No	0.5017	0.0897	0.3714	20.8
			WT 1/12X	2	19	No	0.5777	0.106	0.5308	24.74	0.3232
	∆F/F0 AP # 10	Mann-Whitney	WT 1X	2	25	No	0.7925	0.1307	0.6063	21.52
			WT 1/12X	2	19	No	0.8118	0.1311	0.7156	23.79	0.5733
	∆F/F0 AP # 20	Mann-Whitney	WT 1X	2	25	No	0.9471	0.1445	0.7056	22.56
			WT 1/12X	2	19	No	0.9107	0.1383	0.8135	22.42	0.9813

## Sheet: Figure 7-supplement 1
Figure	Parameter measured	Statistical test	Genotype	Number of independent cultures	Number of observations	Parametric distribution 'Kolmogorov - Smirnov test'	Mean	SEM	Median	Mean ranks	Adjusted p-value (vs WT 1X)
Figure 7-supplement 1C	∆F/F0 AP # 1	Mann-Whitney	WT 1X	2	25	No	0.1027	0.03867	0.02723	21.8
			WT 1/12 X	2	19	No	0.1001	0.02893	0.04004	23.42	0.6901
	∆F/F0 AP # 2	Mann-Whitney	WT 1X	2	25	No	0.1848	0.03905	0.09956	20.4
			WT 1/12 X	2	19	No	0.2834	0.08666	0.1586	25.26	0.2204
	∆F/F0 AP # 5	Mann-Whitney	WT 1X	2	25	No	0.5017	0.0897	0.3714	20.8
			WT 1/12 X	2	19	No	0.5777	0.106	0.5308	24.74	0.3232
	∆F/F0 AP # 10	Mann-Whitney	WT 1X	2	25	No	0.7925	0.1307	0.6063	21.52
			WT 1/12 X	2	19	No	0.8118	0.1311	0.7156	23.79	0.5733
	∆F/F0 AP # 20	Mann-Whitney	WT 1X	2	25	No	0.9471	0.1445	0.7056	22.56
			WT 1/12 X	2	19	No	0.9107	0.1383	0.8135	22.42	0.9813
