# Supplementary material for: Reexamination of N-terminal domains of syntaxin-1 in vesicle fusion from central murine synapses
Source: eLife. 2021 Aug 24;10:e69498. doi: 10.7554/eLife.69498 (PMC8416022; doi:10.7554/eLife.69498)
Supplement: Figure 7—source data 1. [file elife-69498-fig7-data1.xlsx]

## Sheet: Fig 7C
Figure	Parameter measured	Statistical test	Genotype	Number of independent cultures	Number of observations	Parametric distribution 'Kolmogorov - Smirnov test'	Mean	SEM	Median	Mean ranks	Adjusted p-value (vs WT)
7C	∆F/F0 AP # 1	Mann-Whitney	WT	2	17	No	0.03372	0.009403	0.02195	9.462
			STX1-null	2	13	Yes	0.2315	0.09562	0.109	20.12	0.0006
	∆F/F0 AP # 2	Mann-Whitney	WT	2	17	No	0.1102	0.01904	0.1131	10.38
			STX1-null	2	13	Yes	0.3806	0.09955	0.3157	19.41	0.0045
	∆F/F0 AP # 5	Unpaired t-test	WT	2	17	Yes	0.3018	0.04301	0.3009
			STX1-null	2	13	Yes	0.7049	0.1353	0.5402		0.0176
	∆F/F0 AP # 10	Unpaired t-test	WT	2	17	Yes	0.4192	0.04218	0.431
			STX1-null	2	13	Yes	1.011	0.1642	0.948		0.0046
	∆F/F0 AP # 20	Unpaired t-test	WT	2	17	Yes	0.4751	0.05398	0.4768
			STX1-null	2	13	Yes	1.155	0.1845	0.9258		0.004
	∆F/F0 At all AP #	two-way ANOVA	WT	2	17		0.6966
			STX1-null	2	13		0.268				<0.0001

## Sheet: Fig 7D
Figure	Parameter measured	Statistical test	Genotype	Number of independent cultures	Number of observations	Parametric distribution 'Kolmogorov - Smirnov test'	Mean	SEM	Median	Mean ranks	Adjusted p-value (vs WT)
7D	∆F/F0 AP # 1	Kruskal-Wallis Dunn's post-hoc	WT	3	26	No	0.2669	0.06604	0.1773	64.63
			∆N2-9	3	22	No	0.2586	0.06212	0.1146	60.25	>0.9999
			∆N2-28	3	23	No	0.2064	0.03447	0.1652	65.67	>0.9999
	∆F/F0 AP # 2	Kruskal-Wallis Dunn's post-hoc	WT	3	26	No	0.3916	0.07167	0.3544	63.96
			∆N2-9	3	22	No	0.3703	0.06292	0.2568	61.36	>0.9999
			∆N2-28	3	23	No	0.3929	0.0541	0.3259	69.3	>0.9999
	∆F/F0 AP # 5	Kruskal-Wallis Dunn's post-hoc	WT	3	26	Yes	0.6524	0.09477	0.5649	61.23
			∆N2-9	3	22	Yes	0.6659	0.0945	0.5513	62.5	>0.9999
			∆N2-28	3	23	No	0.7007	0.08476	0.547	68.3	>0.9999
	∆F/F0 AP # 10	Kruskal-Wallis Dunn's post-hoc	WT	3	26	Yes	0.9827	0.1238	0.9099	64.37
			∆N2-9	3	22	Yes	0.8361	0.1077	0.7539	59.25	>0.9999
			∆N2-28	3	23	No	0.8865	0.1026	0.6615	63.89	>0.9999
	∆F/F0 AP # 20	Kruskal-Wallis Dunn's post-hoc	WT	3	26	No	1.102	0.1397	0.9999	63.42
			∆N2-9	3	22	Yes	0.8955	0.1129	0.8452	56.27	>0.9999
			∆N2-28	3	23	Yes	0.963	0.1127	0.7863	61.96	>0.9999
	∆F/F0 At all AP #	two-way ANOVA	WT	3	26		0.6791
			∆N2-9	3	22		0.6053				0.9042
			∆N2-28	3	23		0.6299				0.9819

## Sheet: Fig 7E
Figure	Parameter measured	Statistical test	Genotype	Number of independent cultures	Number of observations	Parametric distribution 'Kolmogorov - Smirnov test'	Mean	SEM	Median	Mean ranks	Adjusted p-value (vs WT)
8E	∆F/F0 AP # 1	Kruskal-Wallis Dunn's post-hoc	WT	3	26	No	0.2669	0.06604	0.1773	64.63
		with data from Fig 7D	LEOpen	3	20	No	0.1066	0.02188	0.06759	42.08	0.0697
			LEOpen + ∆N2-28	3	19	No	0.1434	0.05242	0.04199	39.32	0.0342
	∆F/F0 AP # 2	Kruskal-Wallis Dunn's post-hoc	WT	3	26	No	0.3916	0.07167	0.3544	63.96
		with data from Fig 7D	LEOpen	3	20	Yes	0.1411	0.02526	0.1253	33.3	0.0049
			LEOpen + ∆N2-28	3	19	No	0.2374	0.0592	0.1487	43.79	0.1446
	∆F/F0 AP # 5	Kruskal-Wallis Dunn's post-hoc	WT	3	26	Yes	0.6524	0.09477	0.5649	61.23
		with data from Fig 7D	LEOpen	3	20	Yes	0.3164	0.04622	0.2608	33.5	0.0139
			LEOpen + ∆N2-28	3	19	Yes	0.4633	0.07514	0.4045	47.21	0.5813
	∆F/F0 AP # 10	Kruskal-Wallis Dunn's post-hoc	WT	3	26	Yes	0.9827	0.1238	0.9099	64.37
		with data from Fig 7D	LEOpen	3	20	Yes	0.4963	0.06709	0.4237	35.95	0.011
			LEOpen + ∆N2-28	3	19	Yes	0.672	0.09624	0.6304	49.45	0.485
	∆F/F0 AP # 20	Kruskal-Wallis Dunn's post-hoc	WT	3	26	No	1.102	0.1397	0.9999	63.42
		with data from Fig 7D	LEOpen	3	20	Yes	0.6195	0.08444	0.4974	39	0.0402
			LEOpen + ∆N2-28	3	19	Yes	0.7911	0.08964	0.7297	53.32	>0.9999
	∆F/F0 At all AP #	two-way ANOVA	WT	3	26		0.6791
			LEOpen	3	20		0.336				<0.0001
			LEOpen + ∆N2-28	3	19		0.4614				0.0198

## Sheet: Fig 7F-7I
Figure	Parameter measured	Statistical test	Genotype	Number of independent cultures	Number of observations	Parametric distribution 'Kolmogorov - Smirnov test'	Mean	SEM
7F	STX1A/Bassoon (%; norm. to WT) x-axis		WT	14	200		100	3.041
			∆N2-28	5	80		57.91	2.918
			LEOpen	9	118		38.16	2.82
			LEOpen + ∆N2-28	5	60		12.94	1.371
			STX1-null	14	181		9.082	0.6281
	Cell Number (DIV 29 / DIV 8 (%)) y-axis		WT	6	180		90.5	4.698
			∆N2-28	4	120		94.18	5.658
			LEOpen	3	90		83.22	7.474
			LEOpen + ∆N2-28	3	90		39.8	3.834
			STX1-null	6	174		2.347	0.4774
7G	RRP Charge (norm. To WT) y-axis		WT	14	135		99.99	8.198
			∆N2-28	6	91		75.12	6.777
			LEOpen	10	61		70.45	8.293
			LEOpen + ∆N2-28	7	61		42.84	5.049
			STX1-null	9	54		3.079	0.7174
7H	docked SV (norm. To WT) y-axis		WT	3	148		100	9.136
			∆N2-28	2	142		103.3	11.61
			LEOpen	3	141		112.7	12.52
			LEOpen + ∆N2-28	2	112		53.9	8.145
			STX1-null	2	92		35.75	7.323
7I	∆F/F0 at AP # 20 norm. To WT y-axis		WT	3	26		100	12.46
			∆N2-28	3	23		86.22	9.391
			LEOpen	3	20		56.5	8.201
			LEOpen + ∆N2-28	3	19		70.99	7.598
			STX1-null	2	13		40.78	4.514
