# Supplementary figures and images for: Reexamination of N-terminal domains of syntaxin-1 in vesicle fusion from central murine synapses
Source: eLife journal article supplement (doi:10.7554/elife.69498), 2021-08-24

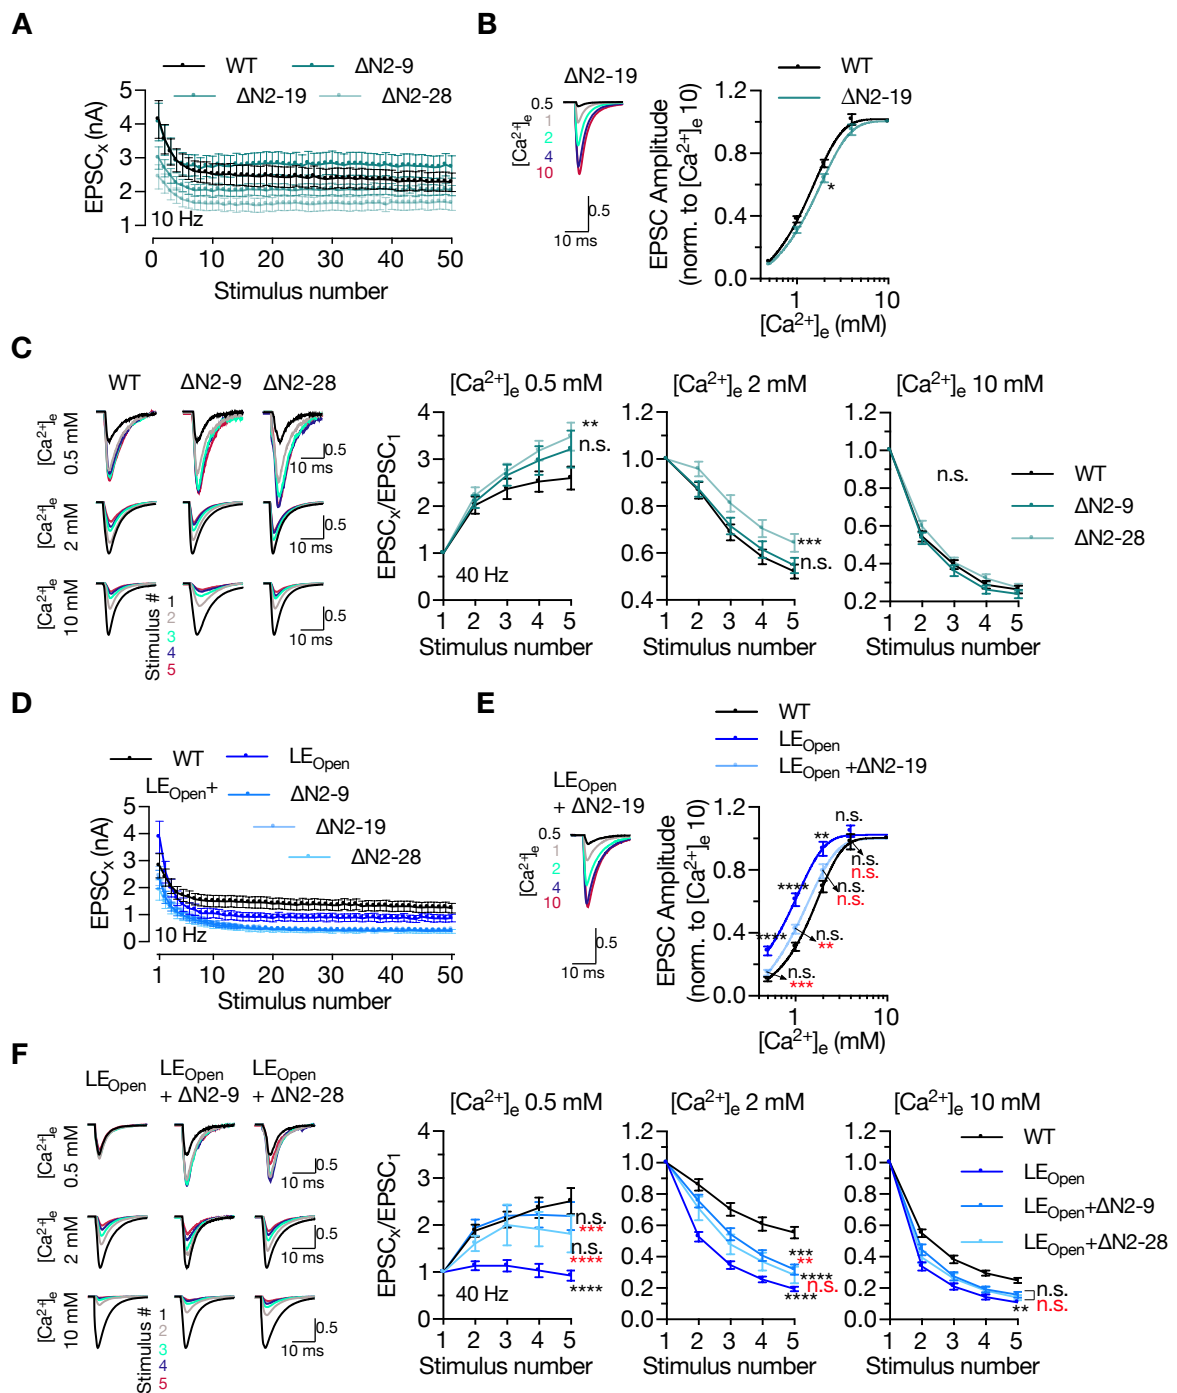

Figure 6-figure supplement 1

Supplement: supp [file elife-69498-supp-v2.zip]

**A**

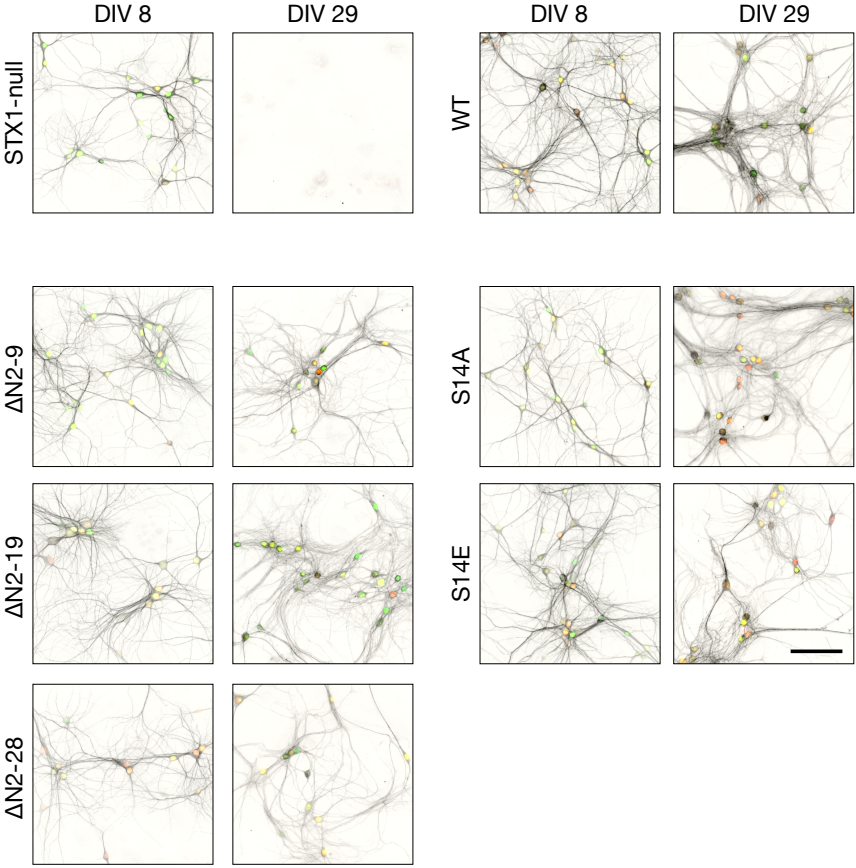

**B**

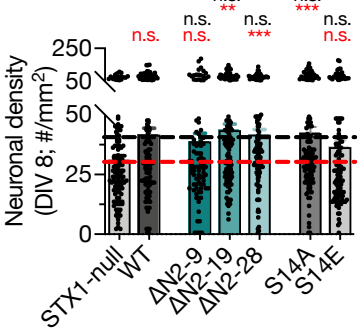

**C**

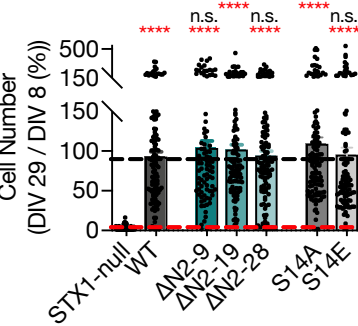

Figure 3-figure supplement 2

Supplement: supp [file elife-69498-supp-v2.zip]

**A**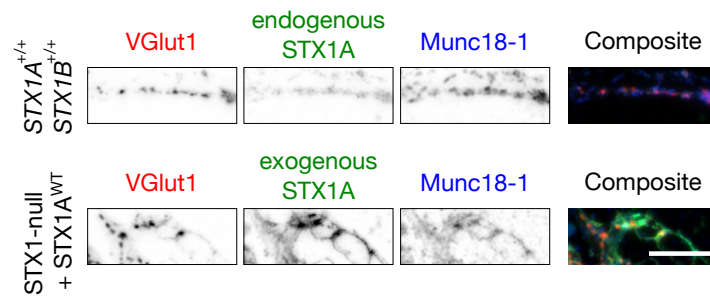**B**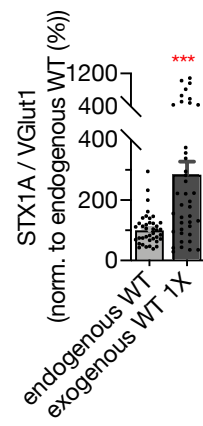**C**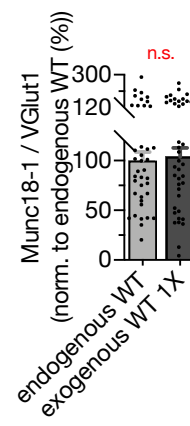**Figure 4-figure supplement 3**

Supplement: supp [file elife-69498-supp-v2.zip]

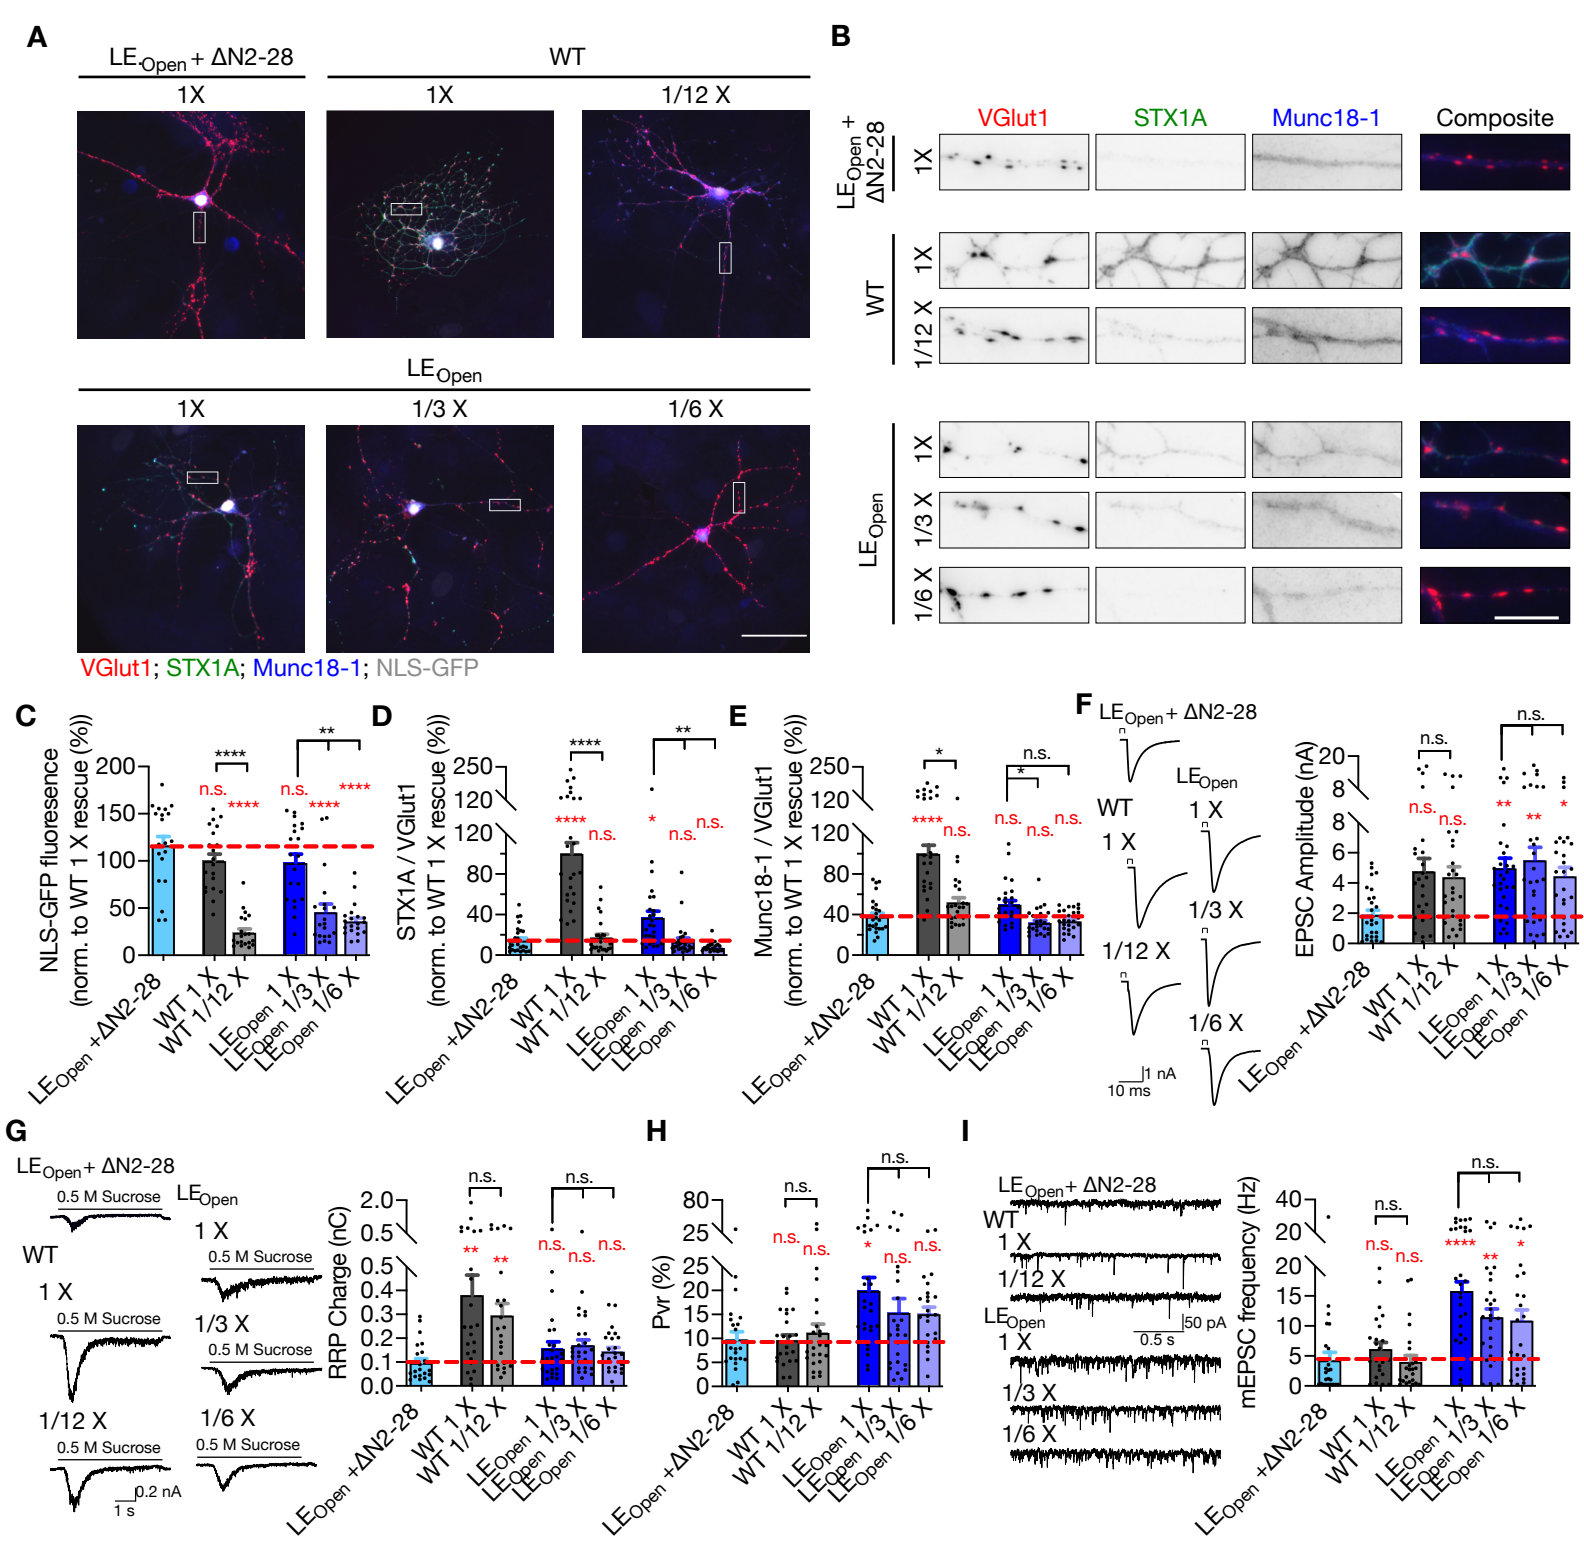

Figure 4-figure supplement 2

Supplement: supp [file elife-69498-supp-v2.zip]

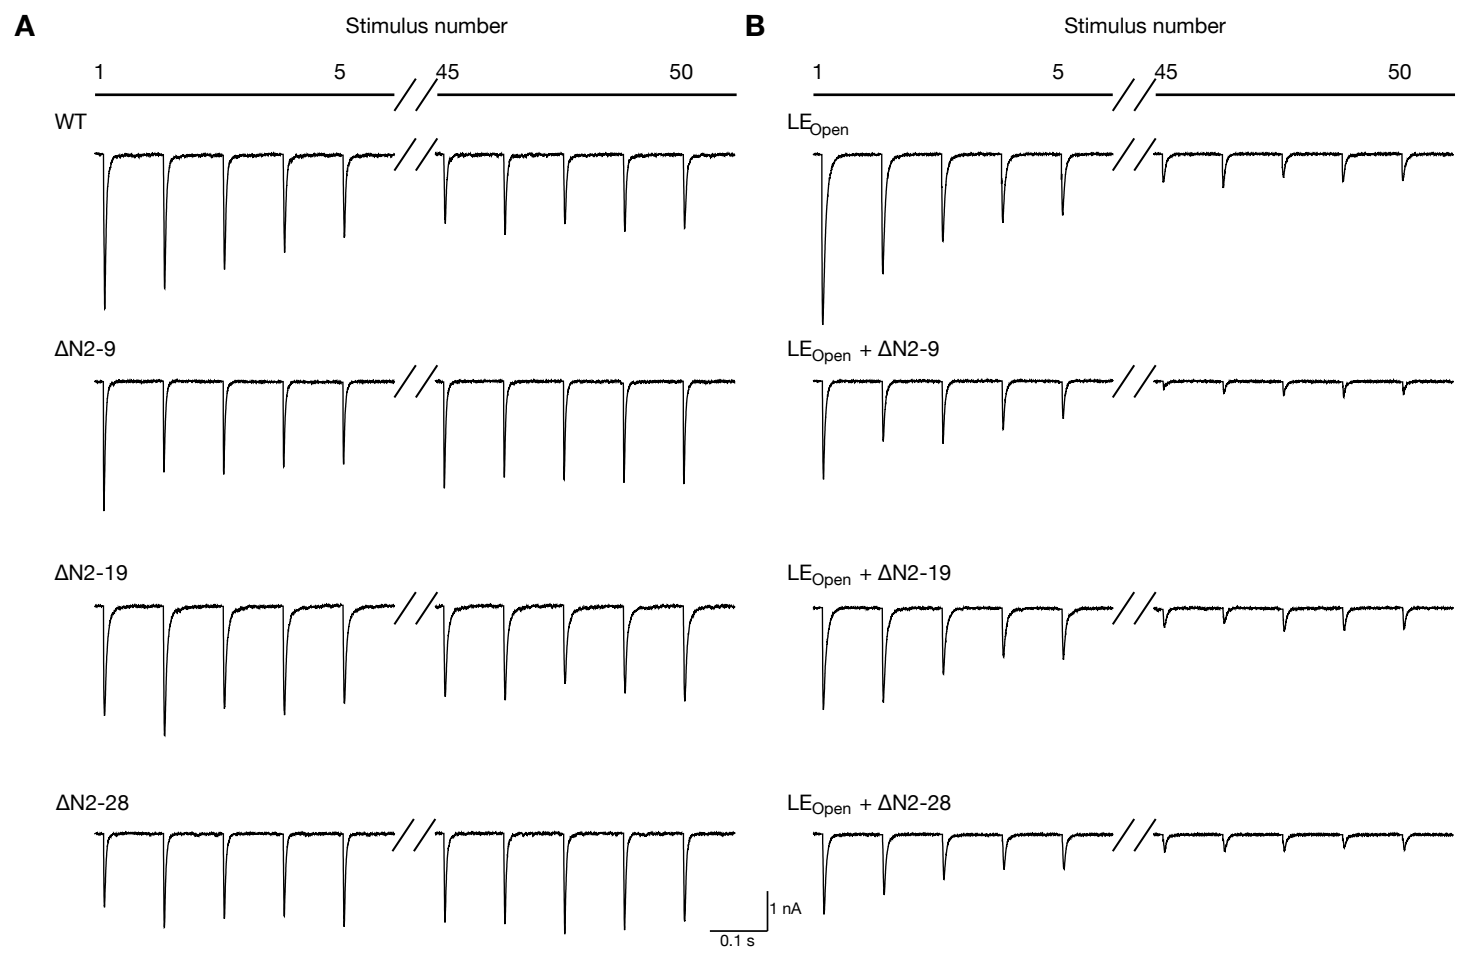

Figure 6-figure supplement 2

Supplement: supp [file elife-69498-supp-v2.zip]

**A**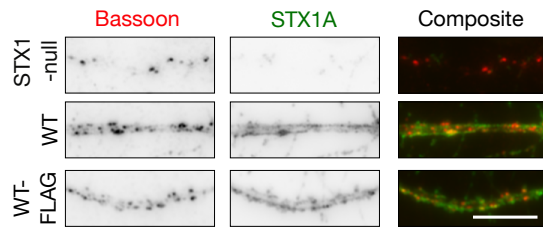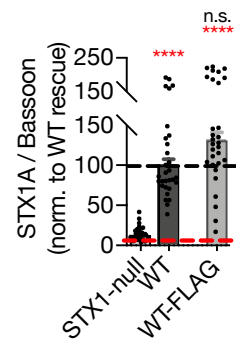**B**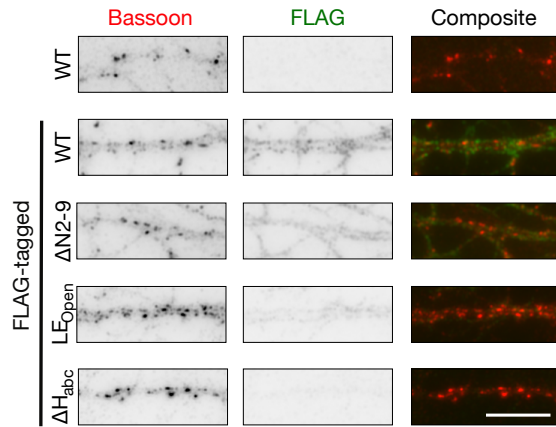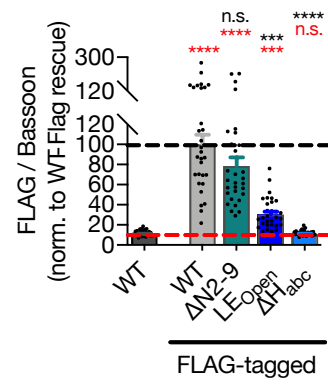**Figure 1-figure supplement 1**

Supplement: supp [file elife-69498-supp-v2.zip]

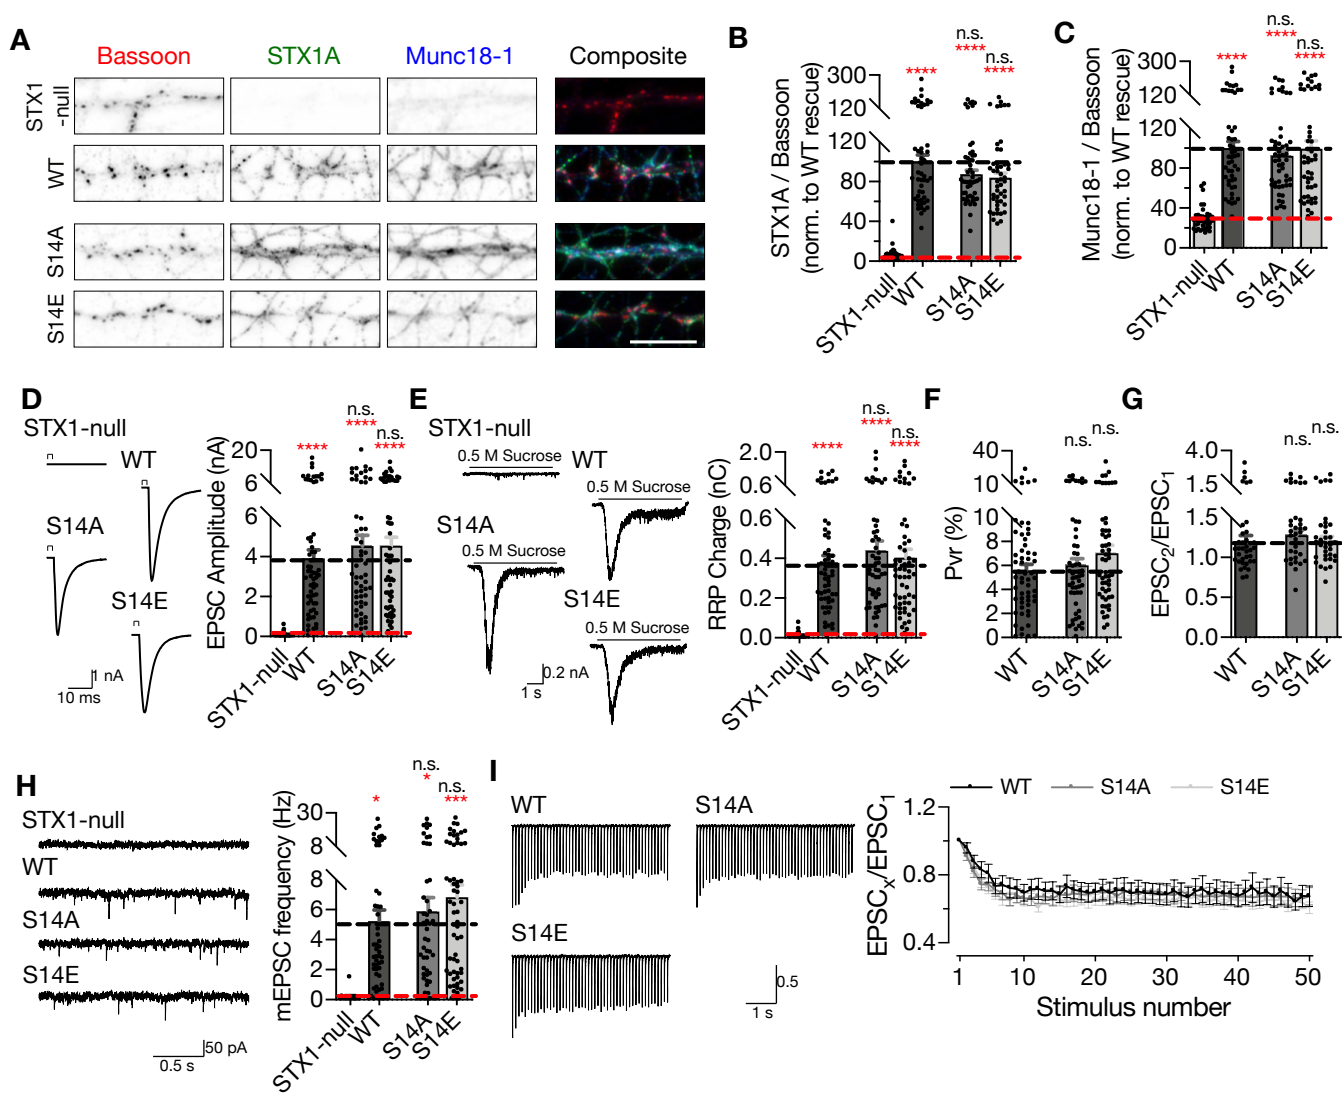

Figure 3-figure supplement 1

Supplement: supp [file elife-69498-supp-v2.zip]

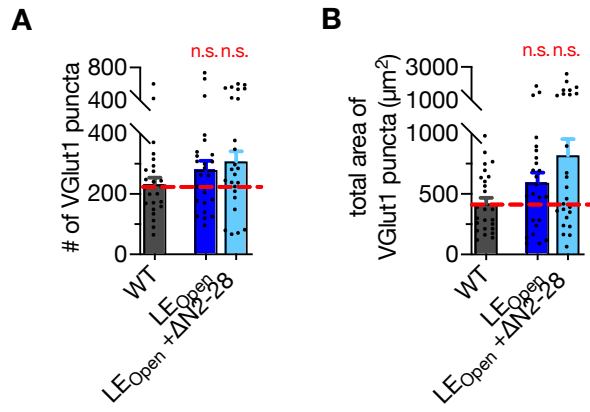

Figure 5 - figure supplement 1

Supplement: supp [file elife-69498-supp-v2.zip]

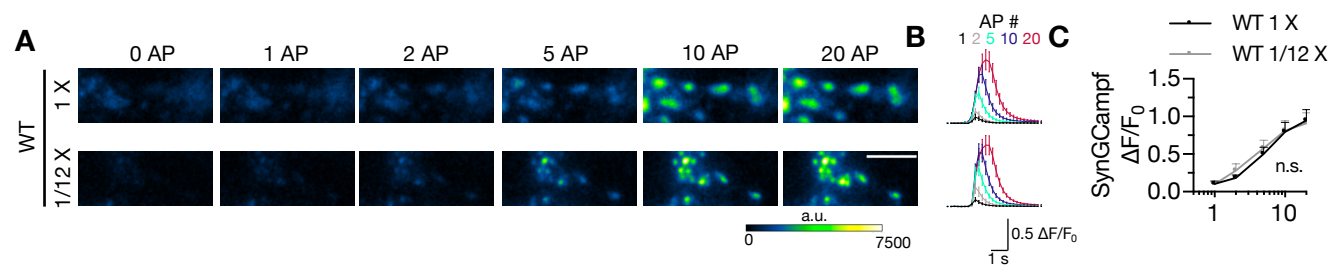

Figure 7-figure supplement 1

Supplement: supp [file elife-69498-supp-v2.zip]

**A**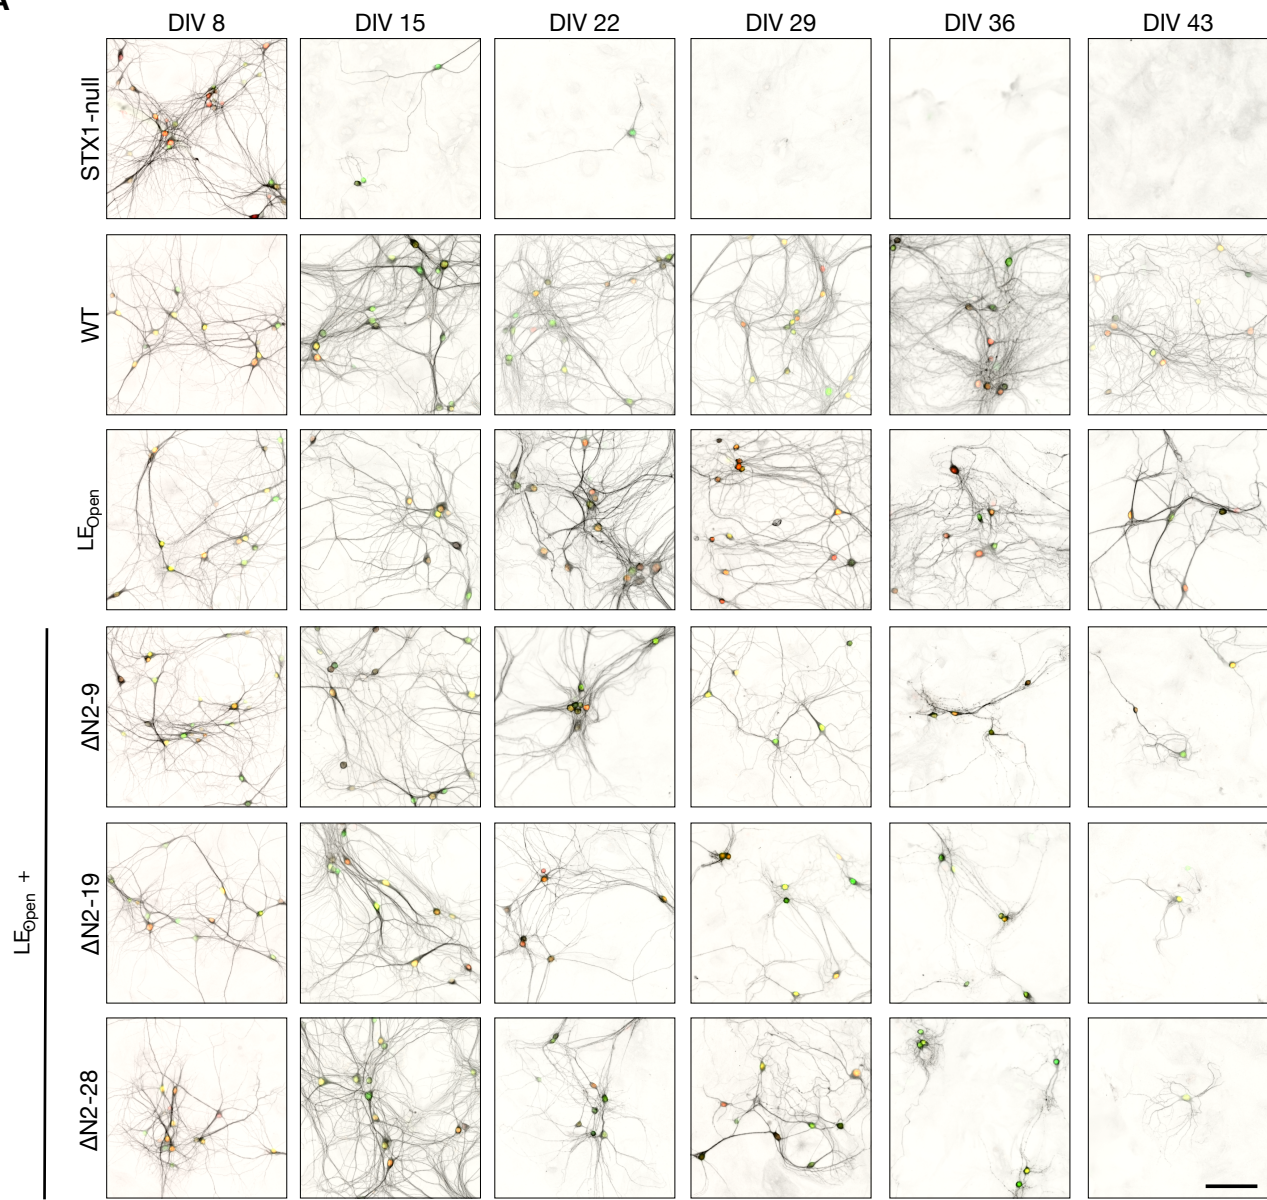**B**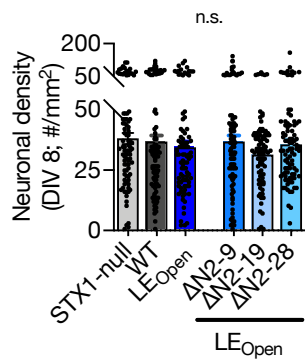**C**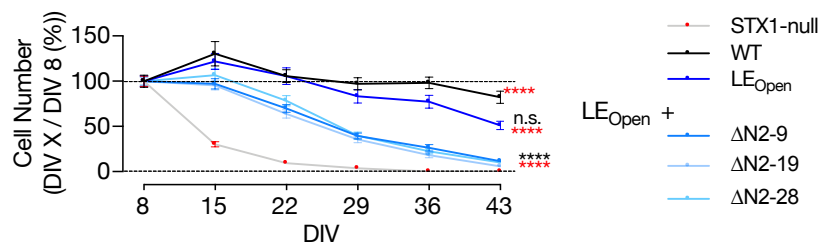

Figure 4-figure supplement 1

Supplement: supp [file elife-69498-supp-v2.zip]
